# Supplementary material for: Monothiatruxene: a new versatile core for functional materials
Source: Royal Society of Chemistry journal article supplement (doi:10.1039/c7ra07671a), 2017-01-01

## Supporting Information

for

### *Monothiatruxene: new versatile core for functional materials*

*Michał R. Maciejczyk,<sup>†‡\*</sup> J. A. Gareth Williams,<sup>§</sup> Neil Robertson,<sup>‡\*</sup> Marek Pietraszkiewicz<sup>†</sup>*

<sup>†</sup> Institute of Physical Chemistry, Polish Academy of Sciences, Kasprzaka 44/52, Warsaw, 01-224, Poland

<sup>§</sup> Department of Chemistry, Durham University, South Road, Durham DH1 3LE, UK

<sup>‡</sup> EaStCHEM School of Chemistry, University of Edinburgh King's Buildings, Edinburgh EH9 3JJ, UK  
m.maciejczyk@ed.ac.uk, neil.robertson@ed.ac.uk

#### Table of contents

|                                                                                      |    |
|--------------------------------------------------------------------------------------|----|
| Experimental Section.....                                                            | 2  |
| General methods.....                                                                 | 2  |
| Optical characterization.....                                                        | 2  |
| Electrochemical characterization.....                                                | 3  |
| Thermal characterization.....                                                        | 6  |
| X-ray Powder Diffraction (XRD).....                                                  | 8  |
| Materials and synthesis.....                                                         | 8  |
| Synthetic procedure for 1,3-bis(2-bromophenyl)-5-(2-thiomethylphenyl)benzene.....    | 9  |
| Synthetic procedure for 1,3-bis(2-bromophenyl)-5-(2-oxythiomethylphenyl)benzene..... | 9  |
| Synthetic procedure for 1,3-bis(2-bromophenyl)-dibenzothiophene.....                 | 10 |
| Synthetic procedure for 1,3-bis(2-diethylhydroxymethylphenyl)-dibenzothiophene.....  | 11 |
| Synthetic procedure for monothiatruxene.....                                         | 12 |
| Synthetic procedure for monosulfonyltruxene.....                                     | 13 |
| Synthetic procedure for brominated monosulfonyltruxenes.....                         | 13 |
| Synthetic procedure for monobrominated monosulfonyltruxenes.....                     | 15 |
| Copies of NMR and MS spectra.....                                                    | 16 |

## Experimental Section

### General methods.

NMR spectra were recorded on a Bruker (400 and 500 MHz) spectrometers for solutions in  $\text{CDCl}_3$ . Chemical shifts are reported in parts per million. Chemical shifts multiplicities are reported as s: singlet, d: doublet, t: triplet, q: quartet, quint: quintet, and m: multiplet. Mass spectra (EI, ESI) were recorded with Xevo QTOF (Waters) high resolution, accurate mass tandem mass spectrometer equipped with Atmospheric Solids Analysis Probe (ASAP) and Bruker MicroToF 2. Elemental analysis was performed at the Institute of Organic Chemistry PAS with a Vario EL III (Elementar GmbH, Germany) and by Stephen Boyer of the Science Centre, London Metropolitan University using a Carlo Erba CE1108 Elemental Analyser.

### Optical characterization

Solution UV-visible absorption spectra were recorded using a Jasco V-670 UV/vis/NIR spectrophotometer controlled with SpectraManager software. Photoluminescence (PL) spectra were recorded with a Fluoromax-3 fluorimeter controlled by the ISAMain software. All samples were measured in a 1 cm cell at room temperature with dichloromethane as solvent. Concentrations used were that to give absorption not higher 0.1 at  $\lambda_{\text{max}}$  for fluorescence measurements and  $10^{-6}$  mol/l for measurements of absorption coefficient. A quinine sulfate in 0.1 N  $\text{H}_2\text{SO}_4$  ( $\Phi = 0.51$ ) was used as a standard for the fluorescence quantum yield determination with solvent refractive index correction.

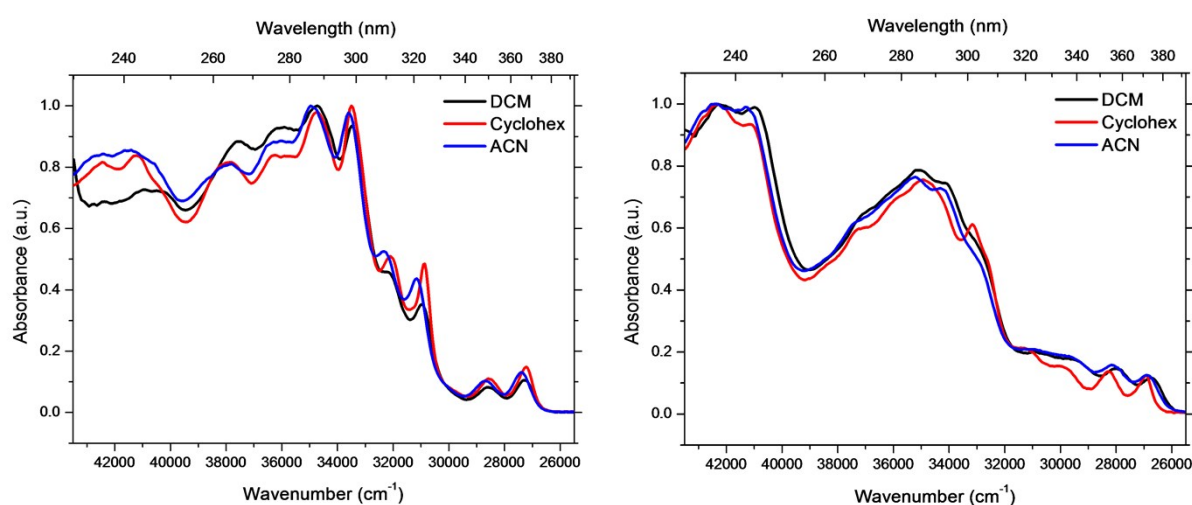

Figure S 1. Normalized absorbance spectra of TrxS (left) and TrxSO<sub>2</sub> (right) in dichloromethane, cyclohexane and acetonitrile.

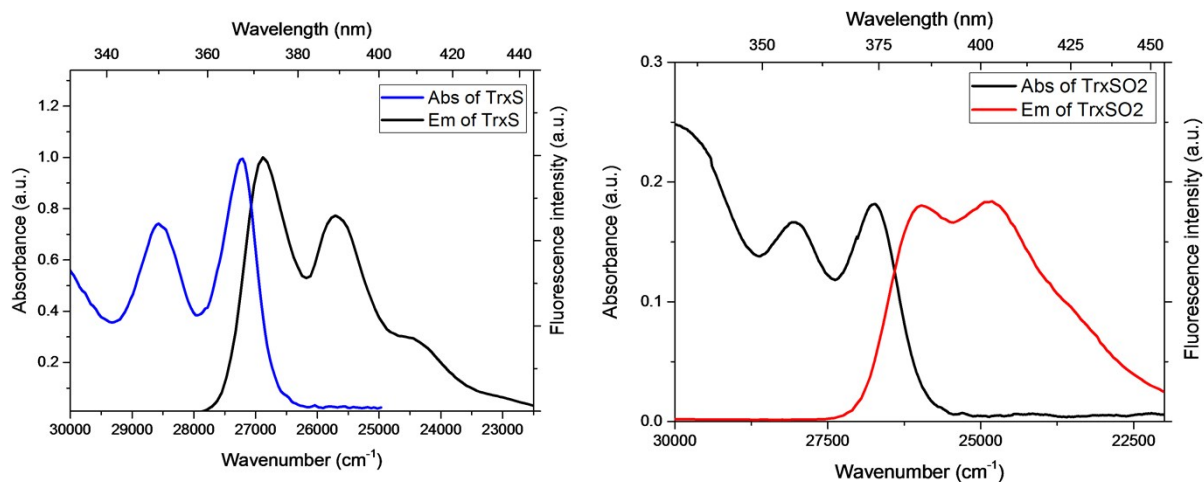

Figure S 2. Normalized absorption and emission spectra in dichloromethane of TrxS (left) and TrxSO<sub>2</sub> (right).

### Electrochemical characterization

All cyclic voltammetry measurements were carried out in freshly distilled CH<sub>2</sub>Cl<sub>2</sub> using 0.3 M [TBA][PF<sub>6</sub>] electrolyte in a three- electrode system, with each solution being purged with nitrogen prior to measurement. The working electrode was a Pt disk. The reference electrode was Ag/AgCl and the counter electrode was a Pt rod. All measurements were made at room temperature using a mAUTOLAB Type III potentiostat, driven by the electrochemical software GPES. Cyclic voltammetry (CV) measurements used scan rates of 0.1 V/s to 0.5 V/s; square wave voltammetry (SWV) was carried out at a step potential of 0.004 V, square wave amplitude of 0.025 V, and a square wave frequency of 25 Hz. Ferrocene was used as the internal standard in each measurement.

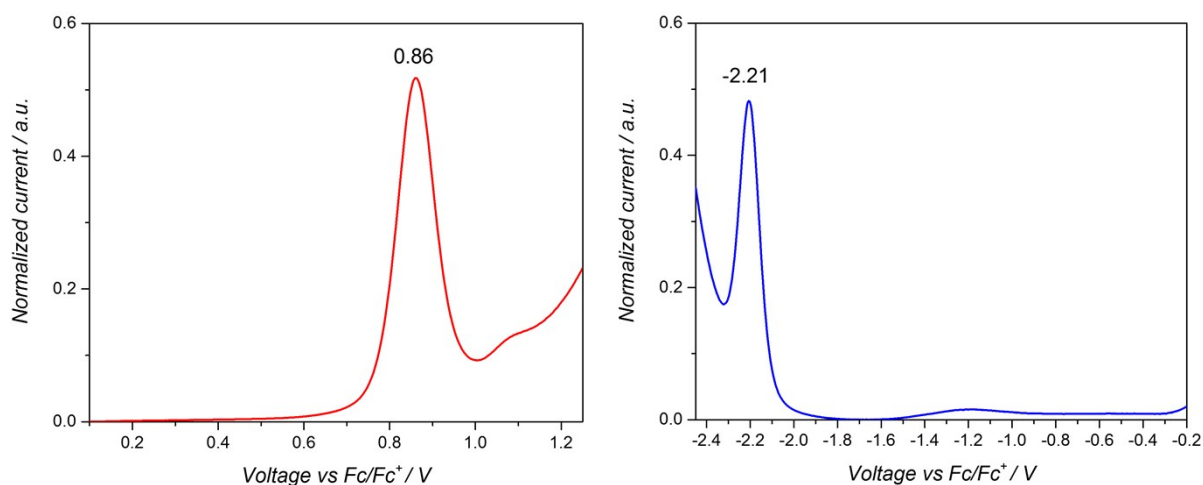

Figure S 3. Square-wave voltammetry (SWV) oxidation of TrxS (left) and reduction of TrxSO<sub>2</sub> (right).

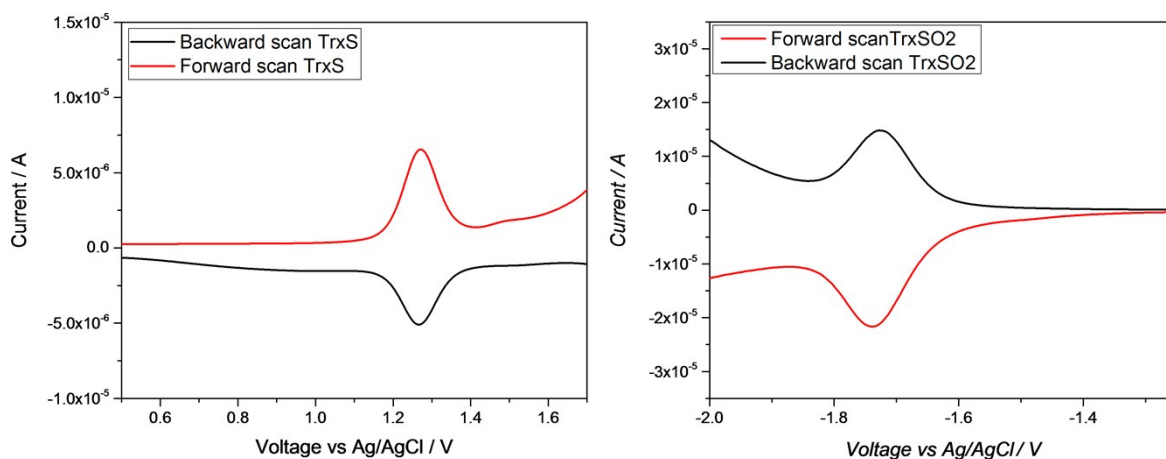

Figure S 4. Square-wave voltammograms of TrxS and TrxSO<sub>2</sub>.

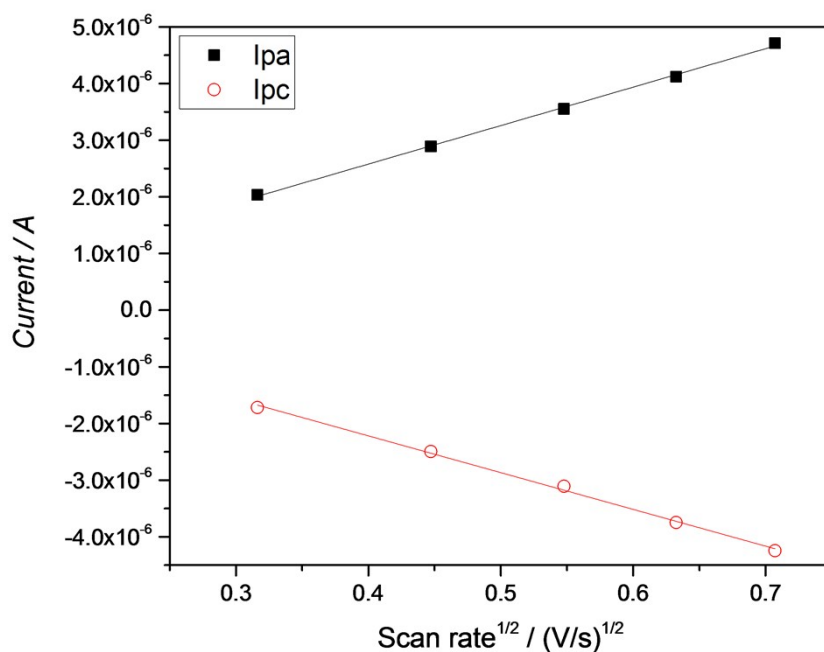

Figure S 5. Plot of ipa (second) and ipc (second) versus (scan rate)<sup>-2</sup> (from 0.1 V/s to 0.5 V/s) from cyclic voltammograms of TrxS.

Above plot for TrxS illustrates that oxidation peak ( $R^2= 0.998$ ) and reduction peak ( $R^2= 0.997$ ) are independent of scan rate. Scan rate plots are consistent with the Randles-Sevcik; the peak current increases with square root of the scan rate.

Table S 1. Cyclic voltammetry data for TrxS.

| Scan rate<br>V/s | (Scan rate) <sup>1/2</sup> | I <sub>pa</sub> /A | I <sub>pc</sub> /A | E <sub>pa</sub> /V | E <sub>pc</sub> /V | ΔE <sub>p</sub> /V | I <sub>pa</sub> /I <sub>pc</sub> |
|------------------|----------------------------|--------------------|--------------------|--------------------|--------------------|--------------------|----------------------------------|
| 0.1              | 0.32                       | 2.03E-06           | -1.72E-06          | 1.316              | 1.238              | 0.078              | -1.2                             |
| 0.2              | 0.45                       | 2.89E-06           | -2.50E-06          | 1.316              | 1.238              | 0.078              | -1.2                             |
| 0.3              | 0.55                       | 3.55E-06           | -3.11E-06          | 1.311              | 1.233              | 0.078              | -1.1                             |
| 0.4              | 0.63                       | 4.12E-06           | -3.75E-06          | 1.316              | 1.238              | 0.078              | -1.1                             |
| 0.5              | 0.71                       | 4.71E-06           | -4.24E-06          | 1.311              | 1.233              | 0.078              | -1.1                             |

The peak-to-peak separation ( $\Delta E_p$ ) is constant 78 mV value when the scan rate is changed. The value is slightly larger than the Nernstian value of 0.059 mV (at 25 °C) for a one-electron reversible redox couple as expected since value for the ferrocene is 80 mV under these conditions. The current ratios ( $I_{pa}/I_{pc}$ ) is approximately 1, proving stability of the oxidized species. Therefore it may be concluded that this redox couple is reversible.

## Thermal characterization

Differential scanning calorimetry (DSC) and Thermogravimetric analysis (TGA) were performed on NETZSCH STA 449F1 under nitrogen atmosphere in DSC/TG aluminium pan at a scan rate of 20 K min<sup>-1</sup> and 10 K min<sup>-1</sup>, respectively.

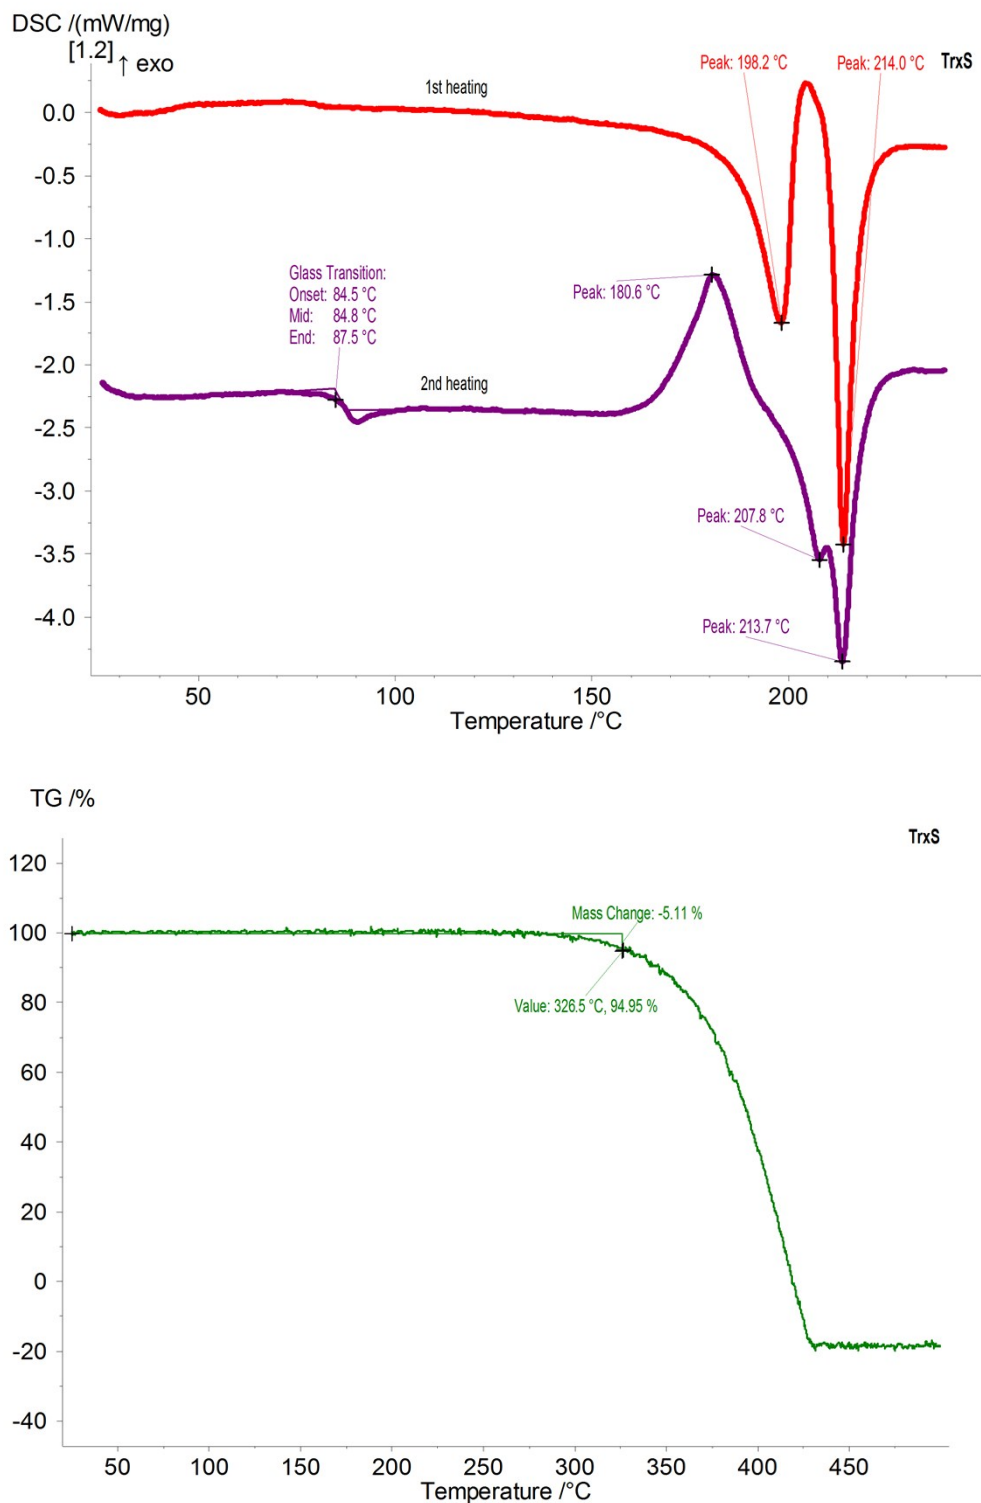

Figure S 6. Differential scanning calorimetry (top) and thermogravimetric analysis (bottom) of TrxS.

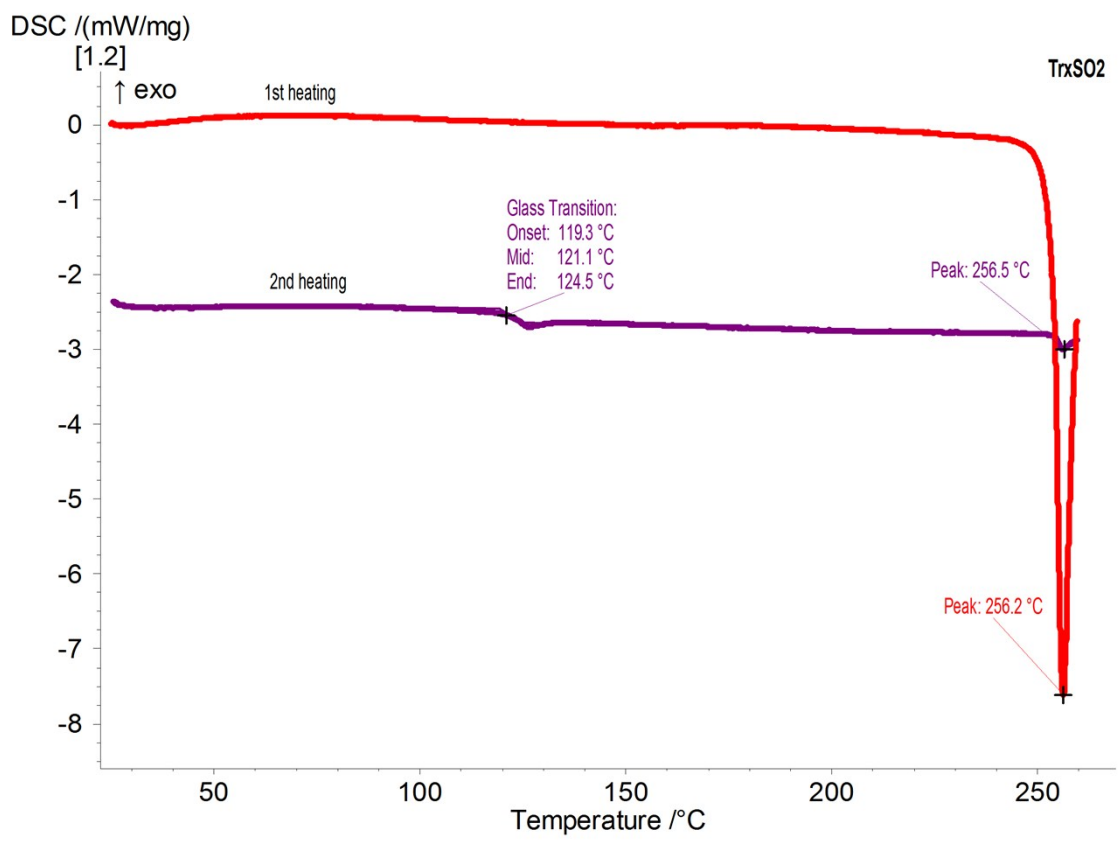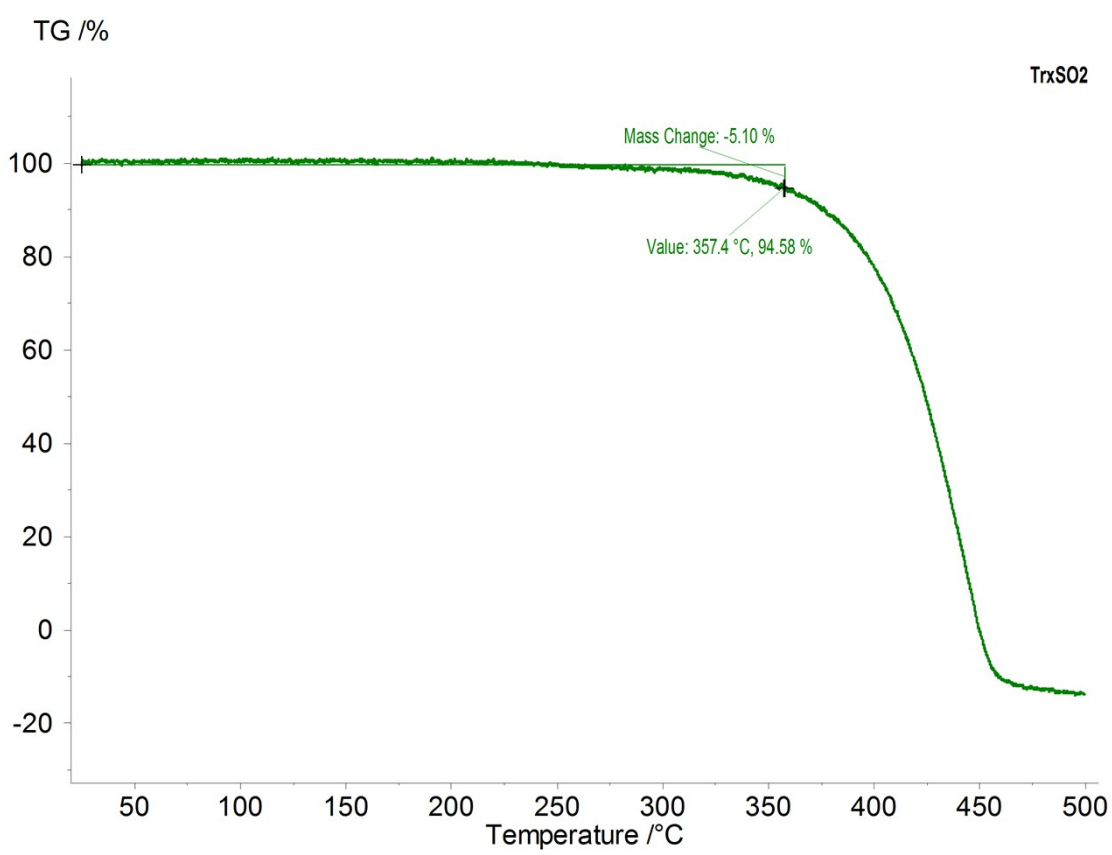

Figure S 7. Differential scanning calorimetry (top) and thermogravimetric analysis (bottom) of TrxSO<sub>2</sub>.

## X-ray Powder Diffraction (XRD)

Powder diffraction was performed on a Bruker Discover D8 with CuK $\alpha$ 1/2 source and a scintillation detector with the powder grind after the reaction.

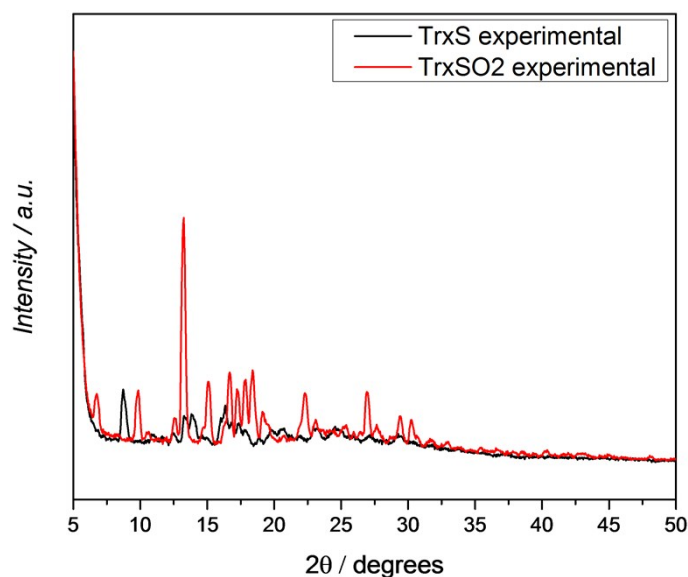

Figure S 8. Experimental XRD powder patterns of TrxS and TrxSO<sub>2</sub>.

## Materials and synthesis.

All preparations were carried out using standard Schlenk line and air-sensitive chemistry techniques under nitrogen atmosphere. Tetrahydrofuran and dichloromethane were dried using a solvent purification system. Column chromatography was carried out using Silica 60A (particle size 35-70  $\mu$ m, Fisher, UK) as the stationary phase, and TLC was performed on pre-coated silica gel plates (0.25 mm thick, 60 F254, Merck, Germany) and observed under UV light. Boron trifluoride diethyl etherate was distilled from calcium hydride with excess of diethyl ether at reduced pressure. Diethyl ketone was dried over molecular sieves type 3A. 1,3,5-tris-2'-bromophenylbenzene was synthesized according to procedure describe earlier.<sup>1</sup> All other materials were purchased from commercial suppliers and used without further purification.

<sup>1</sup> Xinliang Feng, Jishan Wu, Volk Enkelmann, Klaus Müllen, *Org. Lett.*, **2006**, 8 (6),1145.



### Synthetic procedure for 1,3-bis(2-bromophenyl)-5-(2-thiomethylphenyl)benzene

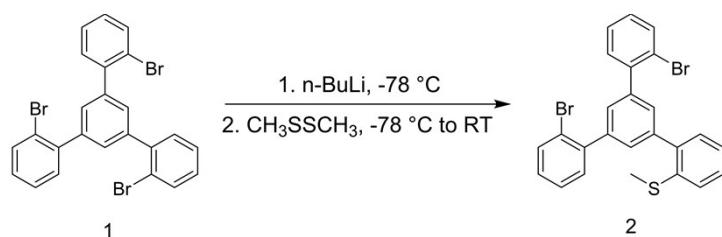

1,3,5-tris(2-bromophenyl)benzene (5 g, 9.208 mmol) was dissolved in THF (30 mL) under nitrogen atmosphere and then n-butyllithium (3.87 mL, 2.5 M, 9.675 mmol) was added dropwise to the solution at -78 °C. After 1 h at this temperature dimethyl disulphide (0.87 mL, 9.668 mmol) was added in 3 mL of THF. The reaction was slowly brought to room temperature and stirred overnight. Then it was quenched with saturated NH<sub>4</sub>Cl solution and extracted with ethyl acetate. Organic layer was dried over anhydrous MgSO<sub>4</sub>, filtered and solvent was removed on rotary evaporator to give yellow oil. Column chromatography of the crude product (SiO<sub>2</sub>, eluent: diethyl ether/hexane 1/70) afforded **2** 3.413 g (73%) as colourless oil.

<sup>1</sup>H NMR (400 MHz, CDCl<sub>3</sub>, δ ppm): 2.40 (s, 3 H, CH<sub>3</sub>), 7.19-7.26 (m, 3 H, Ar-H), 7.31-7.39 (m, 5 H, Ar-H), 7.46-7.53 (m, 5 H, Ar-H), 7.69 (d, *J*=7.8 Hz, 2 H, Ar-H).

<sup>13</sup>C NMR (100 MHz, CDCl<sub>3</sub>, δ ppm): 16.3 (CH<sub>3</sub>), 122.8 (C<sub>Ar</sub>), 125.0 (C<sub>Ar</sub>), 125.8 (C<sub>Ar</sub>), 127.5 (C<sub>Ar</sub>), 128.21 (C<sub>Ar</sub>), 128.97 (C<sub>Ar</sub>), 129.7 (C<sub>Ar</sub>), 130.5 (C<sub>Ar</sub>), 131.7 (C<sub>Ar</sub>), 133.3 (C<sub>Ar</sub>), 137.3 (C<sub>Ar</sub>), 140.1 (C<sub>Ar</sub>), 140.5 (C<sub>Ar</sub>), 140.6 (C<sub>Ar</sub>), 142.2 (C<sub>Ar</sub>).

MS (ESI): *m/z* (%)= 510.62 [M<sup>+</sup>, 24]; 532.66 [(M+Na)<sup>+</sup>, 92].

### Synthetic procedure for 1,3-bis(2-bromophenyl)-5-(2-oxythiomethylphenyl)benzene

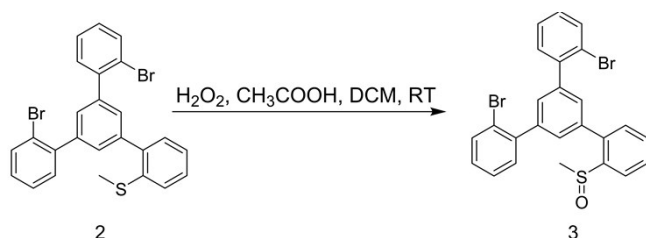

A flask was charged with **1** (3.413 g, 6.688 mmol), dichloromethane (2 mL), glacial acetic acid (30 mL) and hydrogen peroxide solution (1 mL, 30%). The reaction mixture was stirred at r.t. for two days. Then water was added and it was extracted with dichloromethane. Organic layer was washed with saturated sodium carbonate, dried over anhydrous MgSO<sub>4</sub>, filtered and

solvent was removed on rotary evaporator to give white foamy solid. Column chromatography of the crude product (SiO<sub>2</sub>, eluent: acetone/hexane 1/5) afforded 2.830 g (80%) of **2** as a white solid.

<sup>1</sup>H NMR (400 MHz, CDCl<sub>3</sub>, δ ppm): 2.49 (s, 3 H, CH<sub>3</sub>), 7.20-7.26 (m, 2 H, Ar-H), 7.36-7.49 (m, 8 H, Ar-H), 7.55 (t, *J*=7.3 Hz, 1 H, Ar-H), 7.63 (t, *J*=7.5 Hz, 1 H, Ar-H), 7.68 (d, *J*=7.9 Hz, 2 H, Ar-H), 8.15 (d, *J*=7.8 Hz, 1 H, Ar-H).

<sup>13</sup>C NMR (100 MHz, CDCl<sub>3</sub>, δ ppm): 41.7 (CH<sub>3</sub>), 122.6 (C<sub>Ar</sub>), 123.5 (C<sub>Ar</sub>), 127.6 (C<sub>Ar</sub>), 129.0 (C<sub>Ar</sub>), 129.3 (C<sub>Ar</sub>), 130.3 (C<sub>Ar</sub>), 130.5 (C<sub>Ar</sub>), 130.8 (C<sub>Ar</sub>), 131.3 (C<sub>Ar</sub>), 133.3 (C<sub>Ar</sub>), 137.4 (C<sub>Ar</sub>), 138.8 (C<sub>Ar</sub>), 141.49 (C<sub>Ar</sub>), 141.54 (C<sub>Ar</sub>), 144.2 (C<sub>Ar</sub>).

MS (ESI): *m/z* (%) = 526.67 [M<sup>+</sup>, 98]; 548.79 [(M+Na)<sup>+</sup>, 80].

Synthetic procedure for 1,3-bis(2-bromophenyl)-dibenzothiophene<sup>2</sup>

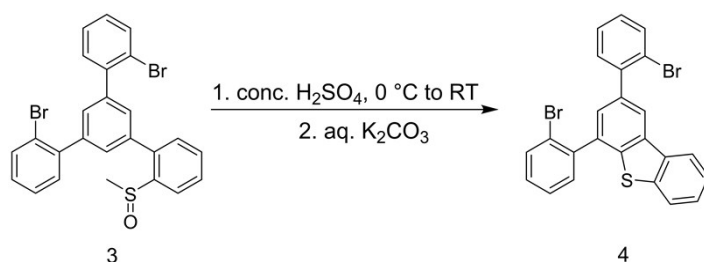

Compound **3** (3.241 g, 6.158 mmol) was added in portions to stirred concentrated H<sub>2</sub>SO<sub>4</sub> (15mL) in a one-necked, round-bottomed flask containing a guard tube at 0-5 °C. The reaction mixture was stirred at room temperature for 1 h. The reaction mixture was poured on ice-cold water and then made basic with aqueous potassium carbonate solution (pH 8). The aqueous layer was extracted with ethyl acetate (2 x 15mL). The organic layer was dried over anhydrous sodium sulfate, filtered and evaporated to give crude product as colourless oil. Column chromatography of the crude product (SiO<sub>2</sub>, eluent: ethyl acetate/hexane 1/30) afforded 2.671 g (88%) of a **4** as a white solid.

<sup>1</sup>H NMR (400 MHz, CDCl<sub>3</sub>, δ ppm): 7.23 (t, *J*=7.19 Hz, 1 H, Ar-H), 7.31 (t, *J*=7.7 Hz, 1 H, Ar-H), 7.38-7.56 (m, 7H, Ar-H), 7.71-7.81 (m, 3 H, Ar-H), 8.18-8.19 (m, 1 H, Ar-H), 8.23 (s, 1 H, Ar-H).

<sup>2</sup> Vrajesh B. Pandya et al, *Synth. Commun.* 42, 497, 2012

$^{13}\text{C}$  NMR (100 MHz,  $\text{CDCl}_3$ ,  $\delta$  ppm): 121.8 ( $\text{C}_{\text{Ar}}$ ), 122.0 ( $\text{C}_{\text{Ar}}$ ), 122.9 ( $\text{C}_{\text{Ar}}$ ), 123.1 ( $\text{C}_{\text{Ar}}$ ), 123.4 ( $\text{C}_{\text{Ar}}$ ), 124.6 ( $\text{C}_{\text{Ar}}$ ), 127.1 ( $\text{C}_{\text{Ar}}$ ), 127.6 ( $\text{C}_{\text{Ar}}$ ), 127.7 ( $\text{C}_{\text{Ar}}$ ), 129.0 ( $\text{C}_{\text{Ar}}$ ), 129.1 ( $\text{C}_{\text{Ar}}$ ), 129.3 ( $\text{C}_{\text{Ar}}$ ), 130.0 ( $\text{C}_{\text{Ar}}$ ), 131.1 ( $\text{C}_{\text{Ar}}$ ), 131.8 ( $\text{C}_{\text{Ar}}$ ), 133.3 ( $\text{C}_{\text{Ar}}$ ), 133.4 ( $\text{C}_{\text{Ar}}$ ), 135.6 ( $\text{C}_{\text{Ar}}$ ), 135.7 ( $\text{C}_{\text{Ar}}$ ), 135.9 ( $\text{C}_{\text{Ar}}$ ), 137.8 ( $\text{C}_{\text{Ar}}$ ), 139.2 ( $\text{C}_{\text{Ar}}$ ), 140.1 ( $\text{C}_{\text{Ar}}$ ), 140.8 ( $\text{C}_{\text{Ar}}$ ), 142.3 ( $\text{C}_{\text{Ar}}$ ).

MS (ESI):  $m/z$  (%) = 414.87 [(M-Br) $^+$ , 100]; 412.90 [(M-Br) $^+$ , 87].

#### Synthetic procedure for 1,3-bis(2-diethylhydroxymethylphenyl)-dibenzothiophene

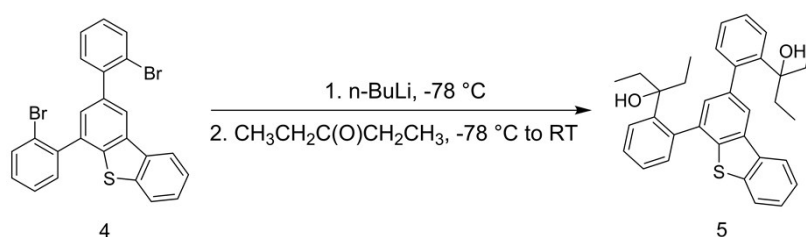

The substrate (**4**) (1.744 g, 3.529 mmol) was dissolved in THF (10 mL) under nitrogen atmosphere and then n-butyllithium (4.6 mL, 1.6 M, 7.411 mmol) was added dropwise to the solution at -78 °C. After 20 min. at this temperature diethyl ketone (0.75 mL, 7.057 mmol) was added in 2 mL of THF. The reaction was slowly brought to room temperature and stirred for 72 hours. Then it was quenched with saturated  $\text{NH}_4\text{Cl}$  solution and extracted with ethyl acetate. Organic layer was dried over anhydrous  $\text{MgSO}_4$ , filtered and solvent was removed on rotary evaporator to give yellowish oil. Column chromatography of the crude product ( $\text{SiO}_2$ , eluent: ethyl acetate/petroleum ether 1/30) afforded 1.102 g (61%) of **5** as a foamy white solid.

$^1\text{H}$  NMR (400 MHz,  $\text{CDCl}_3$ ,  $\delta$  ppm): 0.77-0.87 (m, 12 H,  $\text{CH}_3$ ), 1.70-2.00 (m, 10 H,  $\text{CH}_2$ , OH), 7.19-7.45 (m, 11 H, Ar-H), 7.78 - 7.80 (m, 1 H, Ar-H), 7.97-8.01 (m, 1 H, Ar-H), 8.11-8.13 (m, 1 H, Ar-H).

$^{13}\text{C}$  NMR (100 MHz,  $\text{CDCl}_3$ ,  $\delta$  ppm): 8.3 ( $\text{CH}_3$ ), 8.4 ( $\text{CH}_3$ ), 8.6 ( $\text{CH}_3$ ), 35.1 ( $\text{CH}_2$ ), 35.5 ( $\text{CH}_2$ ), 36.1 ( $\text{CH}_2$ ), 36.5 ( $\text{CH}_2$ ), 79.9 ( $\text{C}-(\text{CH}_2)_2$ ), 80.2 ( $\text{C}-(\text{CH}_2)_2$ ), 119.6 ( $\text{C}_{\text{Ar}}$ ), 120.4 ( $\text{C}_{\text{Ar}}$ ), 121.9 ( $\text{C}_{\text{Ar}}$ ), 122.9 ( $\text{C}_{\text{Ar}}$ ), 124.5 ( $\text{C}_{\text{Ar}}$ ), 125.6 ( $\text{C}_{\text{Ar}}$ ), 126.0 ( $\text{C}_{\text{Ar}}$ ), 126.2 ( $\text{C}_{\text{Ar}}$ ), 126.8 ( $\text{C}_{\text{Ar}}$ ), 127.4 ( $\text{C}_{\text{Ar}}$ ), 128.1 ( $\text{C}_{\text{Ar}}$ ), 132.2 ( $\text{C}_{\text{Ar}}$ ), 132.6 ( $\text{C}_{\text{Ar}}$ ), 134.7 ( $\text{C}_{\text{Ar}}$ ), 135.9 ( $\text{C}_{\text{Ar}}$ ), 138.4 ( $\text{C}_{\text{Ar}}$ ), 138.7 ( $\text{C}_{\text{Ar}}$ ), 140.6 (s, 1 C,  $\text{C}_{\text{Ar}}$ ), 140.8 ( $\text{C}_{\text{Ar}}$ ), 143.2 ( $\text{C}_{\text{Ar}}$ ), 144.4 ( $\text{C}_{\text{Ar}}$ ).

MS (ESI):  $m/z$  (%) = 530.96 [(M+Na) $^+$ , 100], 472.97 [(M-2Et+Na) $^+$ , 100].

### Synthetic procedure for monothiatruxene<sup>3</sup>

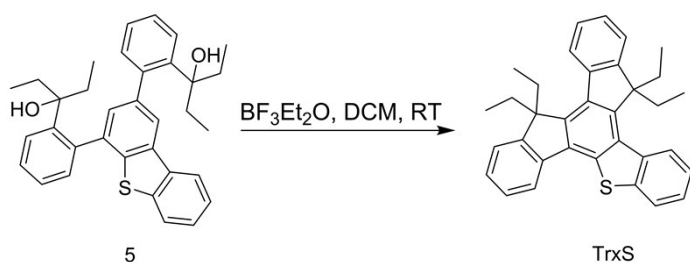

Diol (5) (1.102 g, 2.166 mmol) was dissolved in CH<sub>2</sub>Cl<sub>2</sub> (40 mL), and then BF<sub>3</sub>Et<sub>2</sub>O (0.6 mL) was injected at room temperature. The reaction mixture was kept for about 10 min and then quenched with methanol. After concentration under vacuum the product TrxS (0.870 g, 85%) was obtained as a white solid.

Elemental analysis (%). Calculated for C<sub>34</sub>H<sub>32</sub>S: C 86.39, H 6.82. Result: C 86.42, H 6.58.

<sup>1</sup>H NMR (400 MHz, CDCl<sub>3</sub>, δ ppm): 0.25 (m, 12 H, CH<sub>3</sub>), 2.24-2.33 (m, 4 H, CH<sub>2</sub>), 2.95-3.04 (m, 2 H, CH<sub>2</sub>), 3.08-3.17 (m, 2 H, CH<sub>2</sub>), 7.38-7.57 (m, 8 H, Ar-H), 8.03 (d, *J*=7.6 Hz, 1 H, Ar-H), 8.18 (d, *J*=7.4 Hz, 1 H, Ar-H), 8.36 (d, *J*=7.4 Hz, 1 H, Ar-H), 8.93 (d, *J*=7.8 Hz, 1 H, Ar-H).

<sup>13</sup>C NMR (100 MHz, CDCl<sub>3</sub>, δ ppm): 8.89 (CH<sub>3</sub>), 8.94 (CH<sub>3</sub>), 29.6 (CH<sub>2</sub>), 29.9 (CH<sub>2</sub>), 57.9 (C-(CH<sub>2</sub>)<sub>2</sub>), 58.9 (C-(CH<sub>2</sub>)<sub>2</sub>), 121.8 (C<sub>Ar</sub>), 122.2 (C<sub>Ar</sub>), 122.5 (C<sub>Ar</sub>), 123.3 (C<sub>Ar</sub>), 124.0 (C<sub>Ar</sub>), 124.2 (C<sub>Ar</sub>), 125.9 (C<sub>Ar</sub>), 126.5 (C<sub>Ar</sub>), 126.7 (C<sub>Ar</sub>), 127.11 (C<sub>Ar</sub>), 127.15 (C<sub>Ar</sub>), 127.2 (C<sub>Ar</sub>), 132.8 (C<sub>Ar</sub>), 133.0 (C<sub>Ar</sub>), 134.6 (C<sub>Ar</sub>), 135.9 (C<sub>Ar</sub>), 137.7 (C<sub>Ar</sub>), 140.5 (C<sub>Ar</sub>), 140.7 (C<sub>Ar</sub>), 140.9 (C<sub>Ar</sub>), 142.6 (C<sub>Ar</sub>), 146.0 (C<sub>Ar</sub>), 152.1 (C<sub>Ar</sub>), 152.2 (C<sub>Ar</sub>).

MS (TOF MS AP<sup>+</sup>):*m/z* (%)= 473.2 [(M+H)<sup>+</sup>, 100], 489.2 [(M+O)<sup>+</sup>, 60], 445.1 [(M-Et)<sup>+</sup>, 50].

<sup>3</sup> Jian Pei et al. ; *J. Am. Chem. Soc.*, **2007**, 129 (37), 11314; Cho, Sung Yong et al., *J. Am. Chem. Soc.*, 129(39), 11910; **2007**

Synthetic procedure for monosulfonyltruxene.

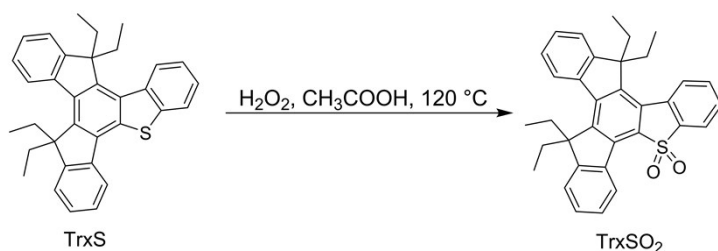

Monothiatruxene (0.044 g, 0.093 mmol) has been suspended in acetic acid (5 mL) and hydrogen peroxide (0.045 mL) was added dropwise. This mixture was then refluxed for 4.5 hours and poured on water, extracted with DCM, dried over magnesium sulfate, filtrated and concentrated on rotavap. Purified by column chromatography (SiO<sub>2</sub>, eluent: acetone/hexane 20/1) gave pure product **TrxSO<sub>2</sub>** 0.040 g (85 %) as a slightly yellow solid.

Elemental analysis (%). Calculated for C<sub>34</sub>H<sub>32</sub>O<sub>2</sub>S: C 80.92, H 6.39. Result: C 81.1, H 6.5.

<sup>1</sup>H NMR (601 MHz, Chloroform-*d*)  $\delta$  0.27 (td,  $J = 7.3, 1.4$  Hz, 12H), 2.21 (m,  $J = 14.1, 10.4, 7.4$  Hz, 4H), 2.89 (m,  $J = 14.0, 7.2, 4.6$  Hz, 4H), 7.43 – 7.52 (m, 6H), 7.59 (td,  $J = 7.5, 0.7$  Hz, 1H), 7.72 (ddd,  $J = 8.3, 7.4, 1.4$  Hz, 1H), 8.00 (dd,  $J = 7.6, 1.3$  Hz, 1H), 8.37 (d,  $J = 7.3$  Hz, 1H), 8.45 (d,  $J = 8.1$  Hz, 1H), 8.68 – 8.77 (m, 1H).

<sup>13</sup>C NMR (100 MHz, CDCl<sub>3</sub>,  $\delta$  ppm): 8.7 (CH<sub>3</sub>), 8.8 (CH<sub>3</sub>), 29.6 (CH<sub>2</sub>), 29.7 (CH<sub>2</sub>), 57.3 (C-(CH<sub>2</sub>)<sub>2</sub>), 58.3 (C-(CH<sub>2</sub>)<sub>2</sub>), 122.0 (C<sub>Ar</sub>-H), 122.5 (C<sub>Ar</sub>-H), 122.6 (C<sub>Ar</sub>-H), 125.0 (C<sub>Ar</sub>-H), 125.3 (C<sub>Ar</sub>-H), 126.9 (C<sub>Ar</sub>-H), 127.4 (C<sub>Ar</sub>-H), 127.6 (C<sub>Ar</sub>-H), 127.8 (C<sub>Ar</sub>), 128.6 (C<sub>Ar</sub>-H), 129.3 (C<sub>Ar</sub>-H), 129.4 (C<sub>Ar</sub>-H), 129.6 (C<sub>Ar</sub>), 131.9 (C<sub>Ar</sub>), 133.2 (C<sub>Ar</sub>-H), 136.6 (C<sub>Ar</sub>), 138.1 (C<sub>Ar</sub>), 138.4 (C<sub>Ar</sub>), 139.9 (C<sub>Ar</sub>), 145.2 (C<sub>Ar</sub>), 145.5 (C<sub>Ar</sub>), 146.3 (C<sub>Ar</sub>), 152.3 (C<sub>Ar</sub>), 153.2 (C<sub>Ar</sub>).

MS (EI):  $m/z$  (%) = 504.2 [(M)<sup>+</sup>, 45]; 475.1 [(M-Et)<sup>+</sup>, 100].

Synthetic procedure for brominated monosulfonyltruxenes.

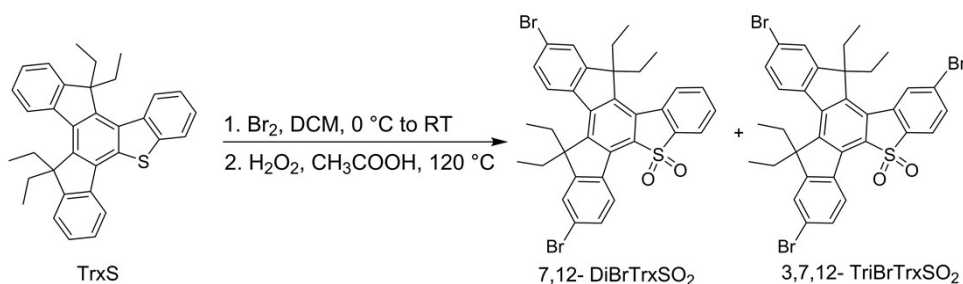

A solution of monothiatruxene (0.660 g, 1.396 mmol) in DCM (30 mL) was cooled to 0°C. Bromine (0.15 mL, 2.862 mmol) was added to the reaction and then it was slowly brought to room temperature. After overnight stirring the reaction was stopped by the addition of sodium thiosulfate solution. It was extracted with DCM, organic layer was dried over anhydrous sodium sulfate, filtered and concentrated on rotary evaporator to give yellow oil. Then glacial acetic acid (45 mL) and hydrogen peroxide solution (0.65 mL, 30%) were added to the flask. After 2.5 h of reflux the reaction was poured onto ice/water and extracted with DCM. Organic layer was dried over magnesium sulfate, filtered and solvent was removed on rotary evaporator to give a yellow solid. Column chromatography of the crude products (SiO<sub>2</sub>, eluent: petroleum ether/chloroform 70/30) gave pure tribrominated truxene 0.103 g (10%) as a slightly yellow solid and dibrominated truxene was further purified by crystallization from acetone to give 0.600 g (65%) of a yellowish solid.

#### Dibrominated truxene

<sup>1</sup>H NMR (500 MHz, CDCl<sub>3</sub>, δ ppm): 0.28 (t, *J*=7.3 Hz, 6H), 0.284 (t, *J*=7.2 Hz, 6H), 2.11–2.23 (m, 4H), 2.76–2.92 (m, 4H), 7.56–7.64 (m, 5H), 7.73 (t, *J*=7.3 Hz, 1H), 7.99 (d, *J*=7.0 Hz, 1H), 8.18 (d, *J*=8.4 Hz, 1H), 8.41 (d, *J*=8.1 Hz, 1H), 8.60 (d, *J*=8.4 Hz, 1H).

<sup>13</sup>C NMR (126 MHz, CDCl<sub>3</sub>, δ ppm): 8.87 (CH<sub>3</sub>), 8.93 (CH<sub>3</sub>), 29.6 (CH<sub>2</sub>), 29.8 (CH<sub>2</sub>), 57.8 (C-(CH<sub>2</sub>)<sub>2</sub>), 58.8 (C-(CH<sub>2</sub>)<sub>2</sub>), 122.8 (C<sub>Ar</sub>-H), 123.6 (C<sub>Ar</sub>-Br), 124.1 (C<sub>Ar</sub>-Br), 125.6 (C<sub>Ar</sub>-H), 126.1 (C<sub>Ar</sub>-H), 126.6 (C<sub>Ar</sub>-H), 126.7 (C<sub>Ar</sub>-H), 127.5 (C<sub>Ar</sub>-H), 128.3 (C<sub>Ar</sub>), 129.9 (C<sub>Ar</sub>-H), 130.2 (C<sub>Ar</sub>), 130.5 (C<sub>Ar</sub>-H), 131.1 (C<sub>Ar</sub>-H), 131.6 (C<sub>Ar</sub>), 133.6 (C<sub>Ar</sub>-H), 135.6 (C<sub>Ar</sub>), 137.8 (C<sub>Ar</sub>), 138.0 (C<sub>Ar</sub>), 139.1 (C<sub>Ar</sub>), 144.6 (C<sub>Ar</sub>), 145.3 (C<sub>Ar</sub>), 145.9 (C<sub>Ar</sub>), 154.5 (C<sub>Ar</sub>), 155.6 (C<sub>Ar</sub>).

MS (ESI): *m/z* (%) = 685.02 [(M+Na)<sup>+</sup>, 100]; 663.04 [(M+H)<sup>+</sup>, 20].

#### Tribrominated truxene

<sup>1</sup>H NMR (500 MHz, CDCl<sub>3</sub>, δ ppm): 0.27 (t, *J*=7.2 Hz, 6H), 0.31 (t, *J*=7.2 Hz, 6H), 2.12–2.25 (m, 4H), 2.70–2.86 (m, 4H), 7.58–7.64 (m, 4H), 7.75 (dd, *J*=8.1 Hz, 1.3 Hz, 1H), 7.85 (d, *J*=8.1 Hz, 1H), 8.18 (d, *J*=8.3 Hz, 1H), 8.55 (d, *J*=8.5 Hz, 1H), 8.56 (d, *J*=1.1 Hz, 1H).

<sup>13</sup>C NMR (126 MHz, CDCl<sub>3</sub>, δ ppm): 8.8 (CH<sub>3</sub>), 8.9 (CH<sub>3</sub>), 29.7 (CH<sub>2</sub>), 29.8 (CH<sub>2</sub>), 57.8 (C-(CH<sub>2</sub>)<sub>2</sub>), 58.9 (C-(CH<sub>2</sub>)<sub>2</sub>), 123.8 (C<sub>Ar</sub>-Br), 123.9 (C<sub>Ar</sub>-H), 124.3 (C<sub>Ar</sub>-Br), 125.6 (C<sub>Ar</sub>-H), 126.1 (C<sub>Ar</sub>-H), 126.6 (C<sub>Ar</sub>-H), 126.7 (C<sub>Ar</sub>-H), 127.0 (C<sub>Ar</sub>), 128.3 (C<sub>Ar</sub>),

130.3 (C<sub>Ar</sub>), 130.6 (C<sub>Ar</sub>), 130.7 (C<sub>Ar</sub>-H), 131.2 (C<sub>Ar</sub>-H), 132.7 (C<sub>Ar</sub>-H), 133.6 (C<sub>Ar</sub>), 135.3 (C<sub>Ar</sub>), 136.8 (C<sub>Ar</sub>), 137.0 (C<sub>Ar</sub>), 139.3 (C<sub>Ar</sub>), 144.7 (C<sub>Ar</sub>), 145.6 (C<sub>Ar</sub>), 146.7 (C<sub>Ar</sub>), 154.5 (C<sub>Ar</sub>), 155.5 (C<sub>Ar</sub>).

MS (EI): m/z (%) = 712.8 [(M-Et)<sup>+</sup>, 100]; 741.9 [(M)<sup>+</sup>, 50].

Synthetic procedure for monobrominated monosulfonyltruxenes

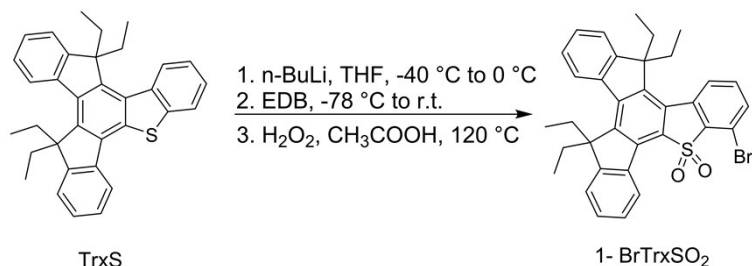

A solution of monothiatruxene (0.418 g, 0.884 mmol) in THF (5 mL) was cooled to -40°C. n-BuLi (0.61 mL, 0.972 mmol, 1.1 eq, 1.6 M) has been added dropwise and it was kept at this temperature for 0.5 h and then it was slowly brought 0°C to be stirred for additional 6 hours. After that the dark mixture was cooled to -78°C and ethylene dibromide (0.15 mL, 1.768 mmol, 2 eq) was added in 0.5 mL of THF. After 30 min. at this temperature the dark colour disappeared and it was stirred overnight at r.t. Then it was quenched with brine and extracted with ethyl acetate, dried over magnesium sulfate, filtrated and concentrated on rotavap to give 0.453 g of crude mixture with 60% of the expected product (according to NMR analysis). This mixture was taken to the next reaction by adding acetic acid (40 mL) and hydrogen peroxide (0.5 mL) dropwise. This cloudy mixture was then refluxed to yield clear yellow solution after 4 hours. It was brought to r.t. and poured on water, extracted with DCM, dried over magnesium sulfate, filtrated and concentrated on rotavap. Purified by column chromatography (SiO<sub>2</sub>, eluent: petroleum ether/DCM 10/1) gave pure product 0.260 g (50 %) as a slightly yellow solid.

<sup>1</sup>H NMR (500 MHz, Chloroform-*d*) δ 0.26 (q, *J* = 7.4 Hz, 12 H), 2.10 – 2.35 (m, 4H), 2.77 – 2.94 (m, 4H), 7.43 – 7.52 (m, 6H), 7.54 (t, *J* = 8.0 Hz, 1H), 7.68 (d, *J* = 7.9 Hz, 1H), 8.34 – 8.40 (m, 1H), 8.42 (d, *J* = 8.1 Hz, 1H), 8.77 (dd, *J* = 6.5, 1.4 Hz, 1H).

<sup>13</sup>C NMR (126 MHz, Chloroform-*d*) δ 8.7 (CH<sub>3</sub>), 8.8 (CH<sub>3</sub>), 29.6 (CH<sub>2</sub>), 29.7 (CH<sub>2</sub>), 57.3 (C-(CH<sub>2</sub>)<sub>2</sub>), 58.3 (C-(CH<sub>2</sub>)<sub>2</sub>), 117.9 (C<sub>Ar</sub>-Br), 122.0 (C<sub>Ar</sub>-H), 122.5 (C<sub>Ar</sub>-H), 125.2 (C<sub>Ar</sub>-H), 125.3 (C<sub>Ar</sub>-H), 126.0 (C<sub>Ar</sub>-H), 126.2 (C<sub>Ar</sub>), 127.0 (C<sub>Ar</sub>-H), 127.6 (C<sub>Ar</sub>-H), 128.8 (C<sub>Ar</sub>-H), 129.4 (C<sub>Ar</sub>-H), 129.7 (C<sub>Ar</sub>), 133.6 (C<sub>Ar</sub>-H),

133.8 ( $C_{Ar-H}$ ), 135.2 ( $C_{Ar}$ ), 136.3 ( $C_{Ar}$ ), 136.4 ( $C_{Ar}$ ), 138.2 ( $C_{Ar}$ ), 139.9 ( $C_{Ar}$ ),  
145.1 ( $C_{Ar}$ ), 145.7 ( $C_{Ar}$ ), 146.9 ( $C_{Ar}$ ), 152.4 ( $C_{Ar}$ ), 153.2 ( $C_{Ar}$ ).

MS (ESI):  $m/z$  (%) = 607.11 [ $(M+Na)^+$ , 100]; 605.11 [ $(M+Na)^+$ , 90]; 585.13 [ $(M+H)^+$ , 50];  
583.11 [ $(M+H)^+$ , 40].



# Copies of NMR and MS spectra

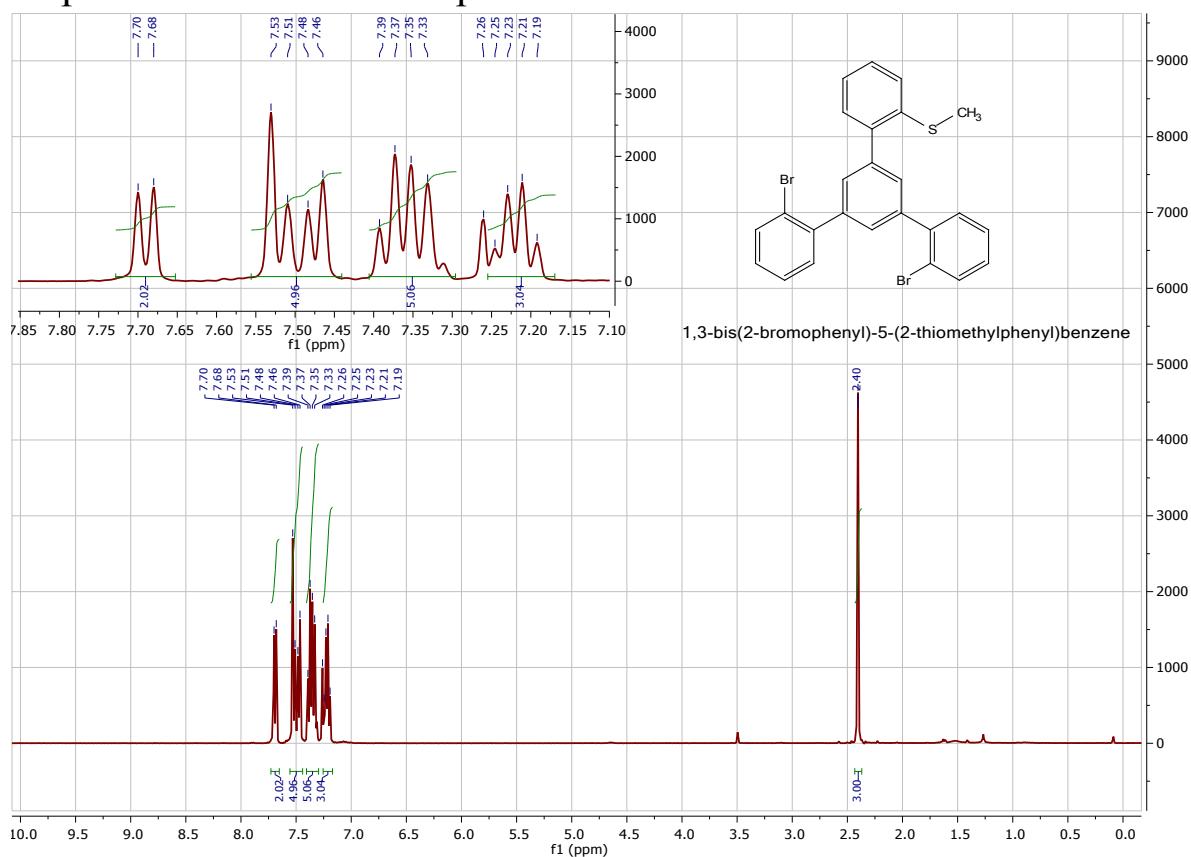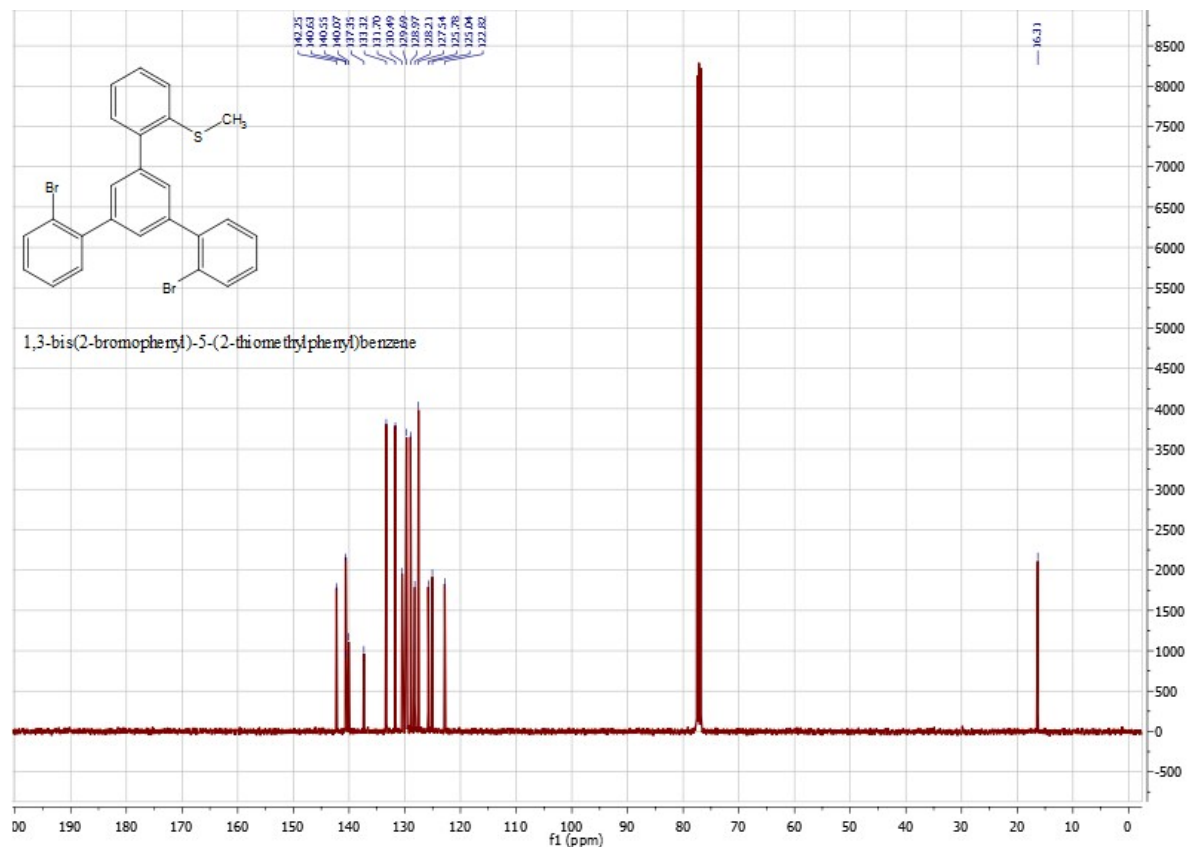

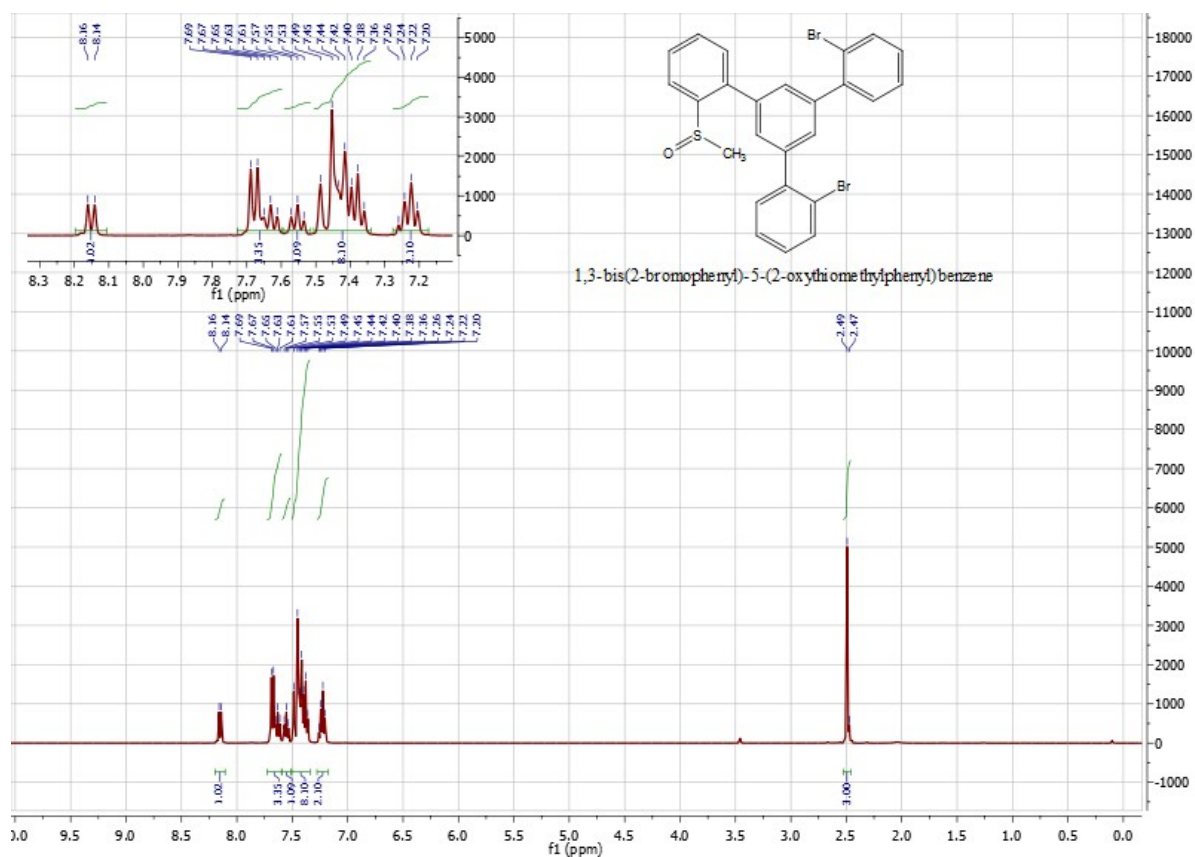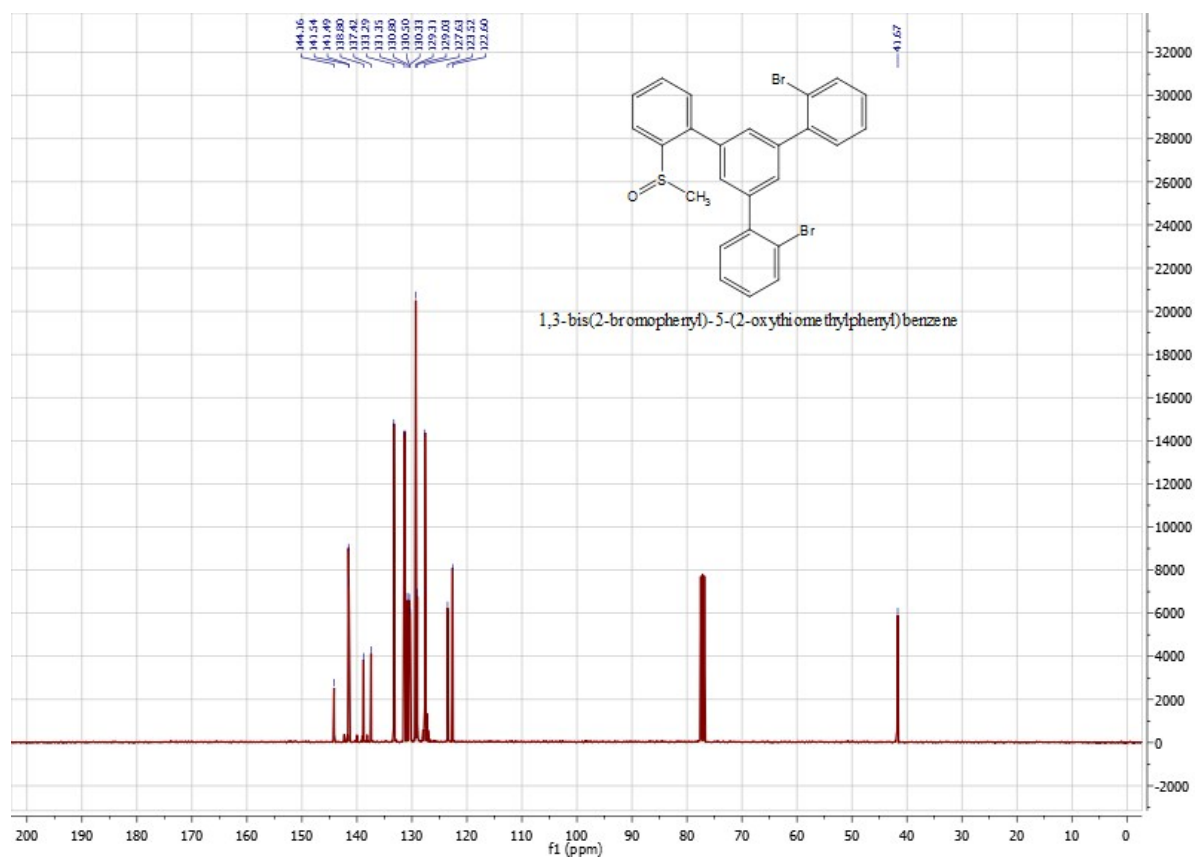

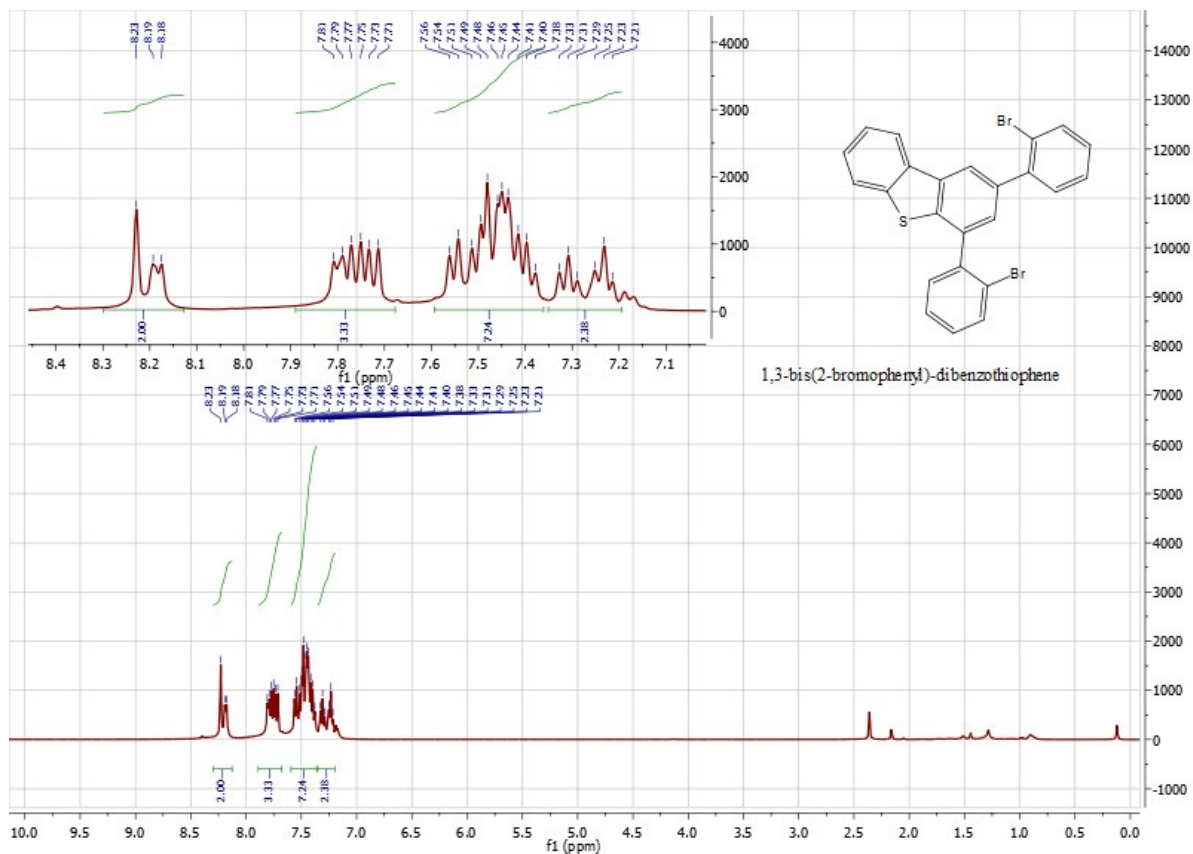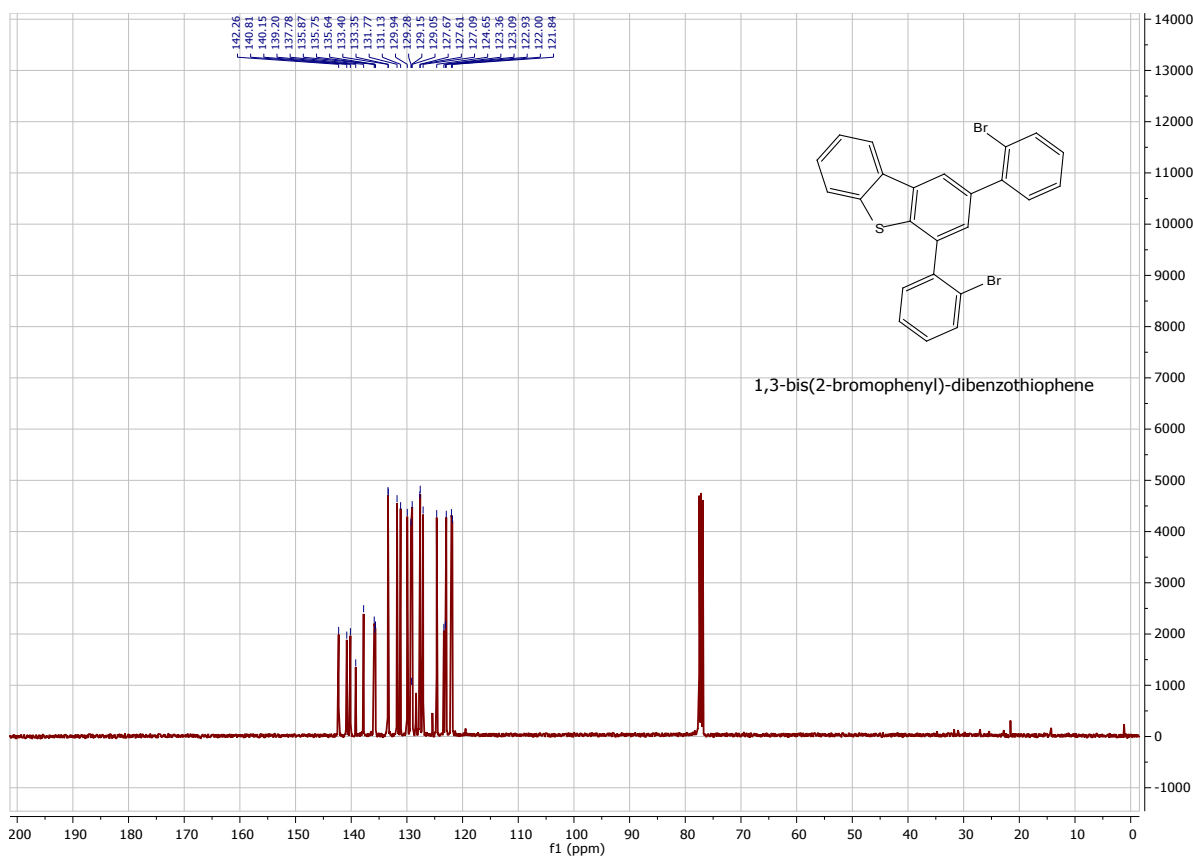

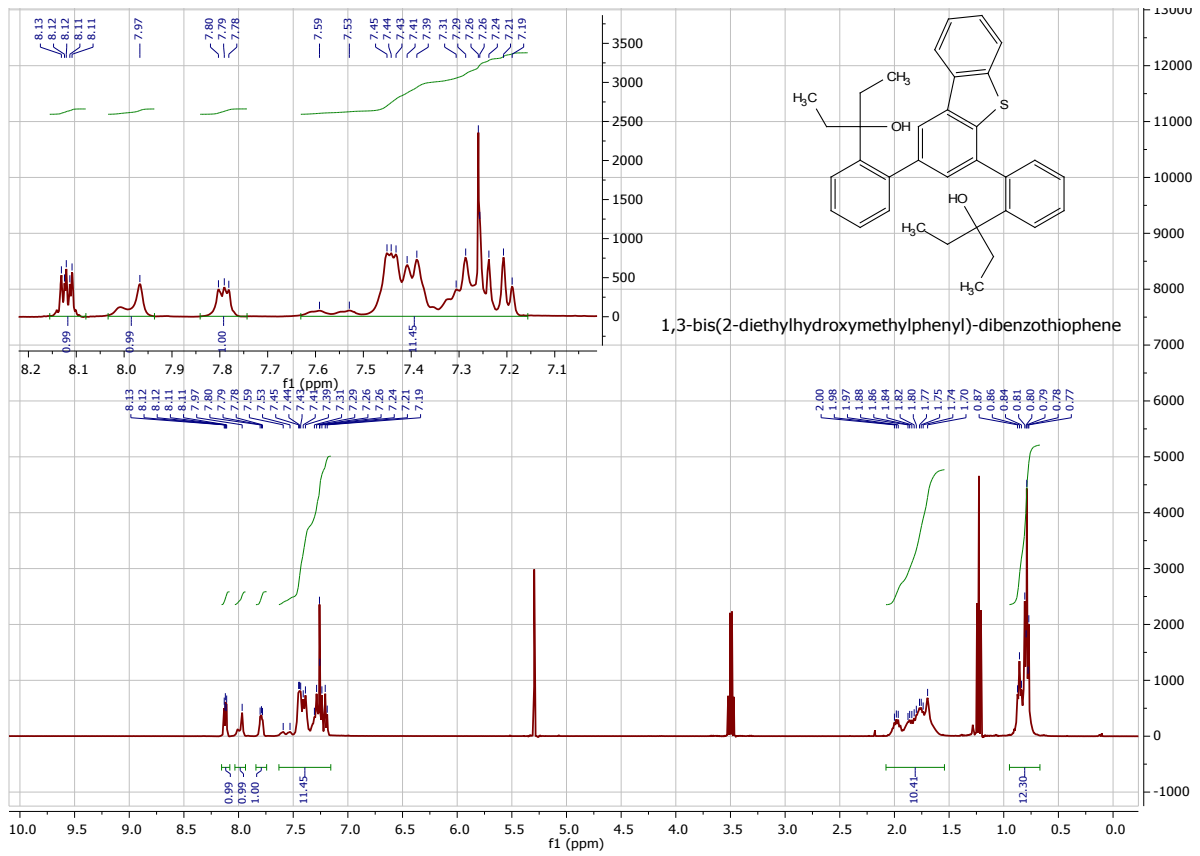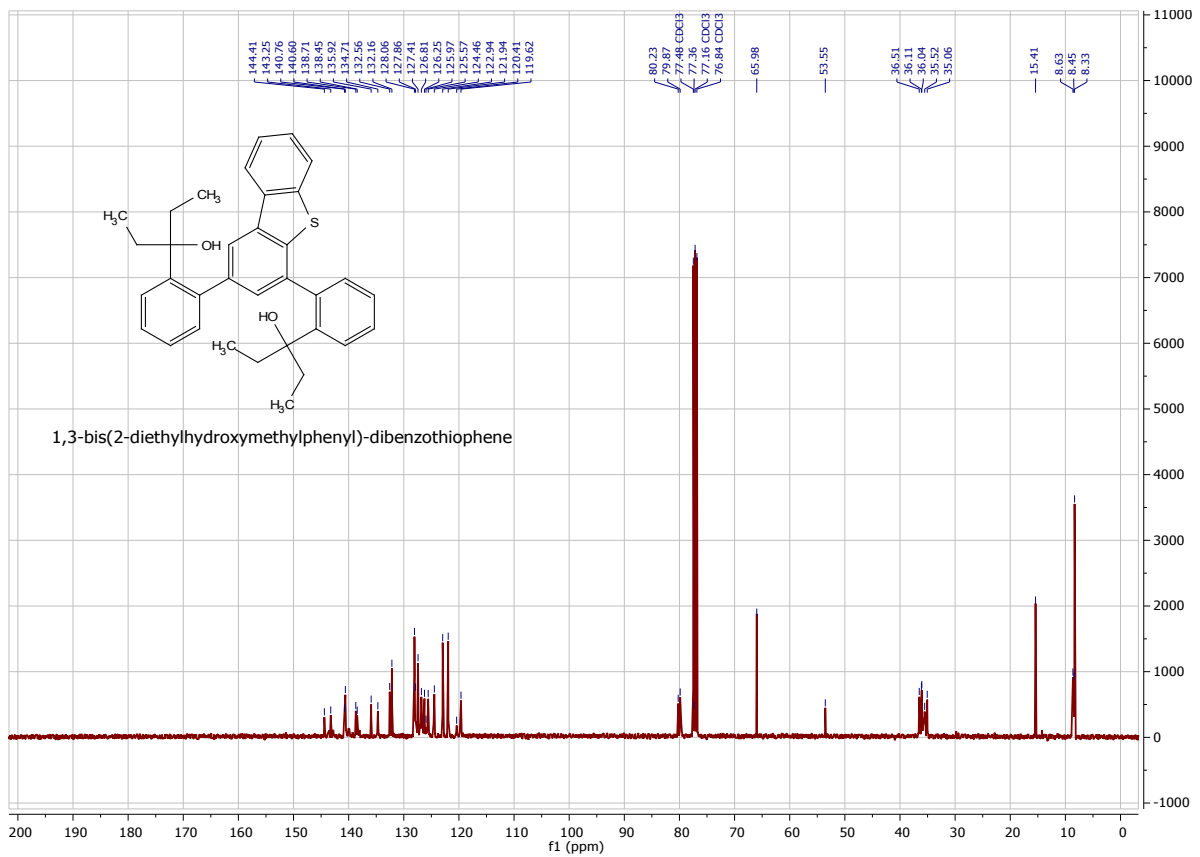

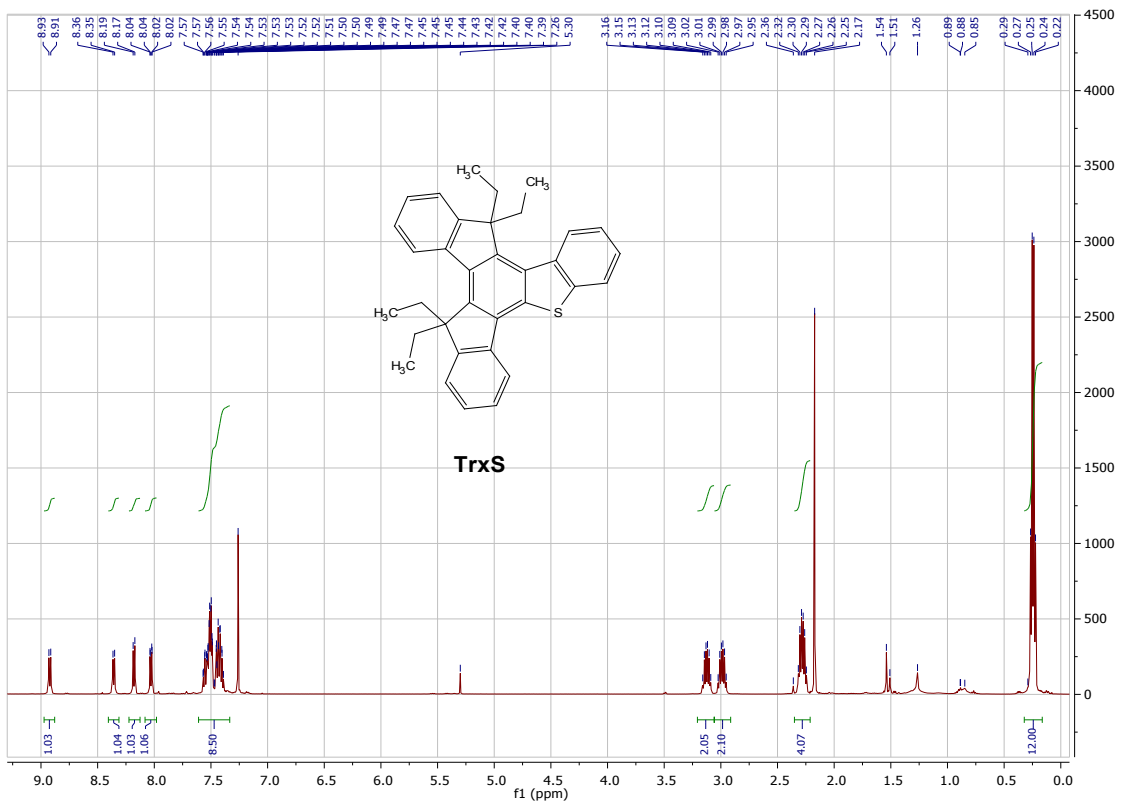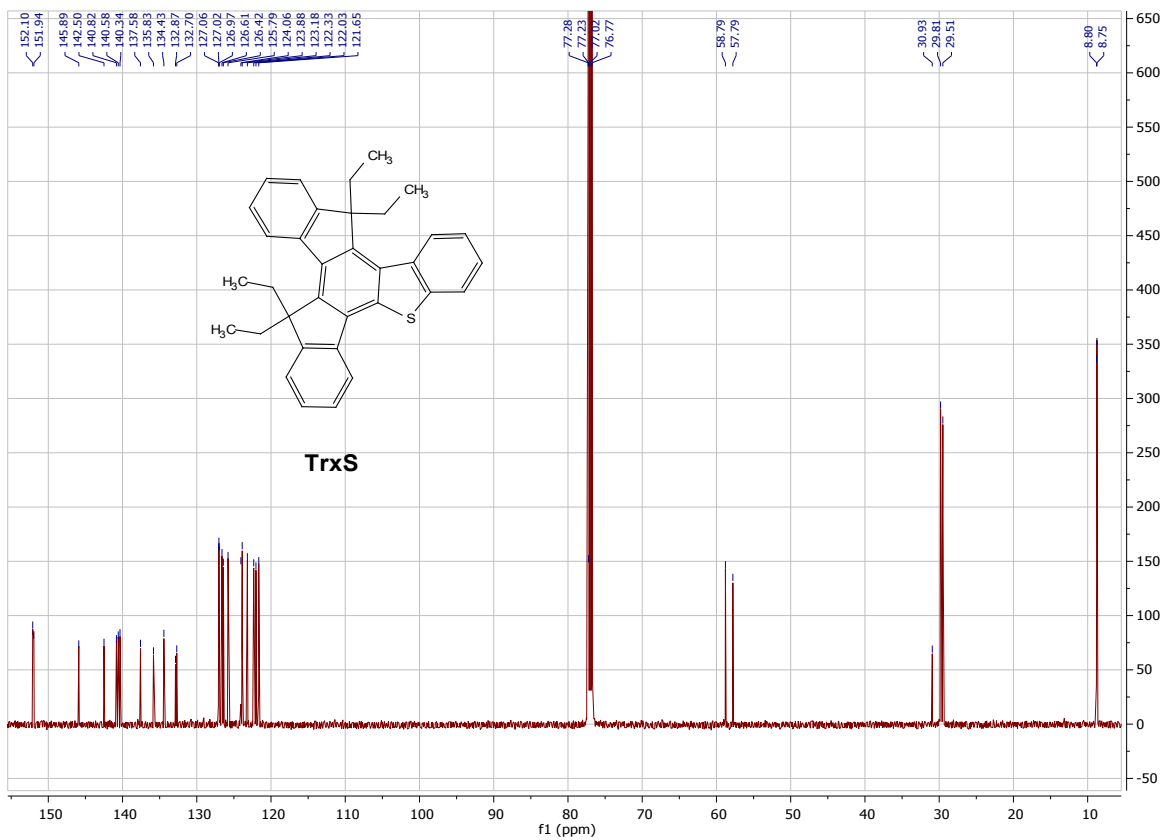

LCT Premier XE, Waters UK Ltd

05-Jun-2013  
15:22:56  
1: TOF MS AP+  
5.95e+004

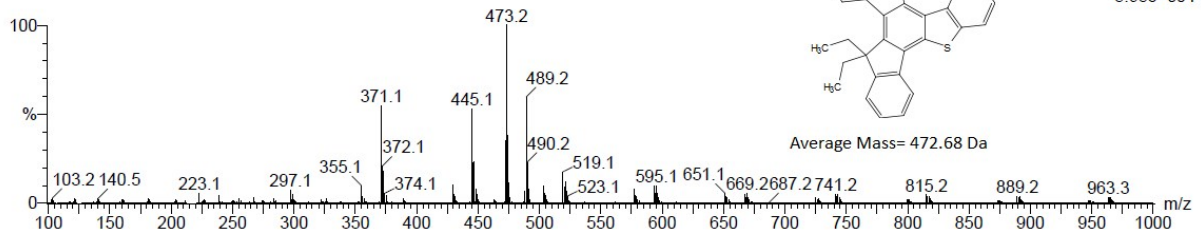



T: + c EI Full ms [ 39.50-1000.50]

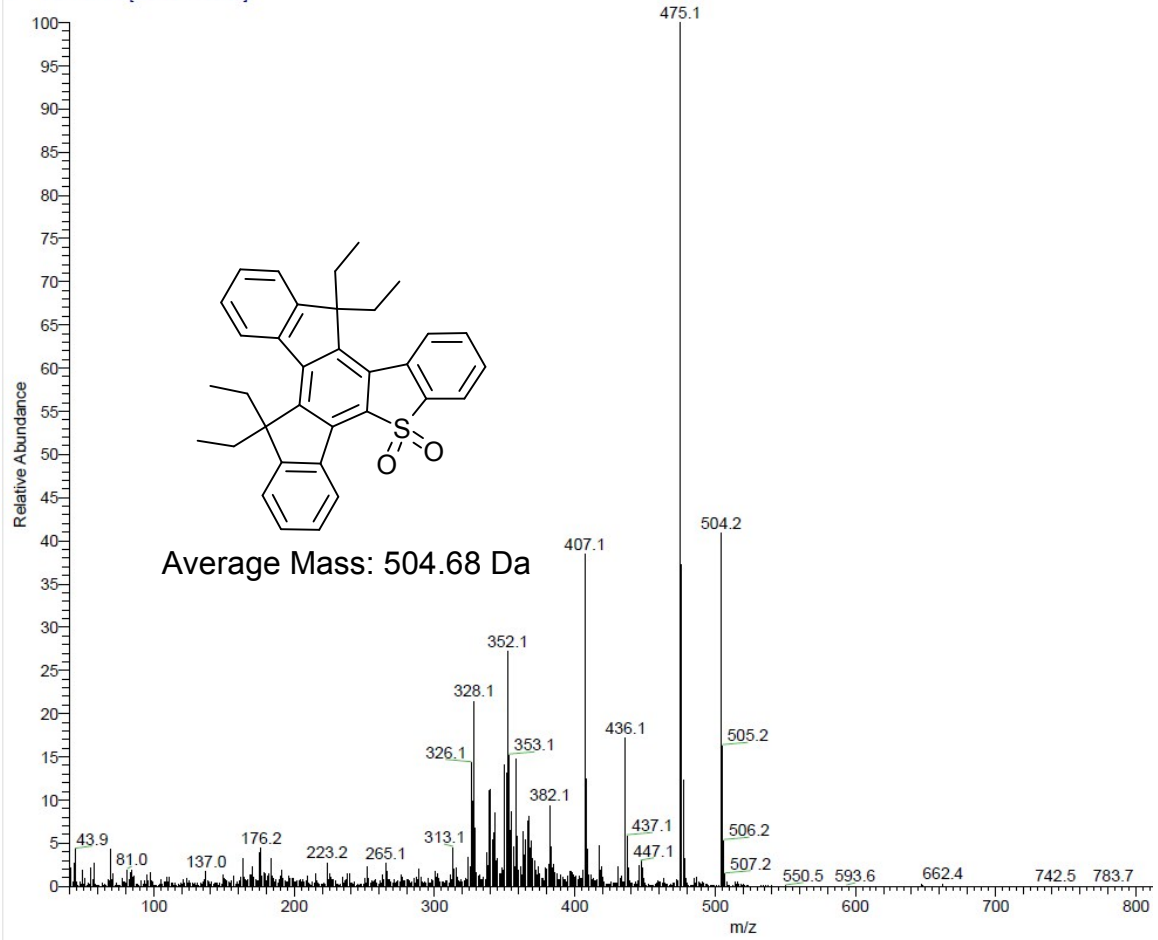



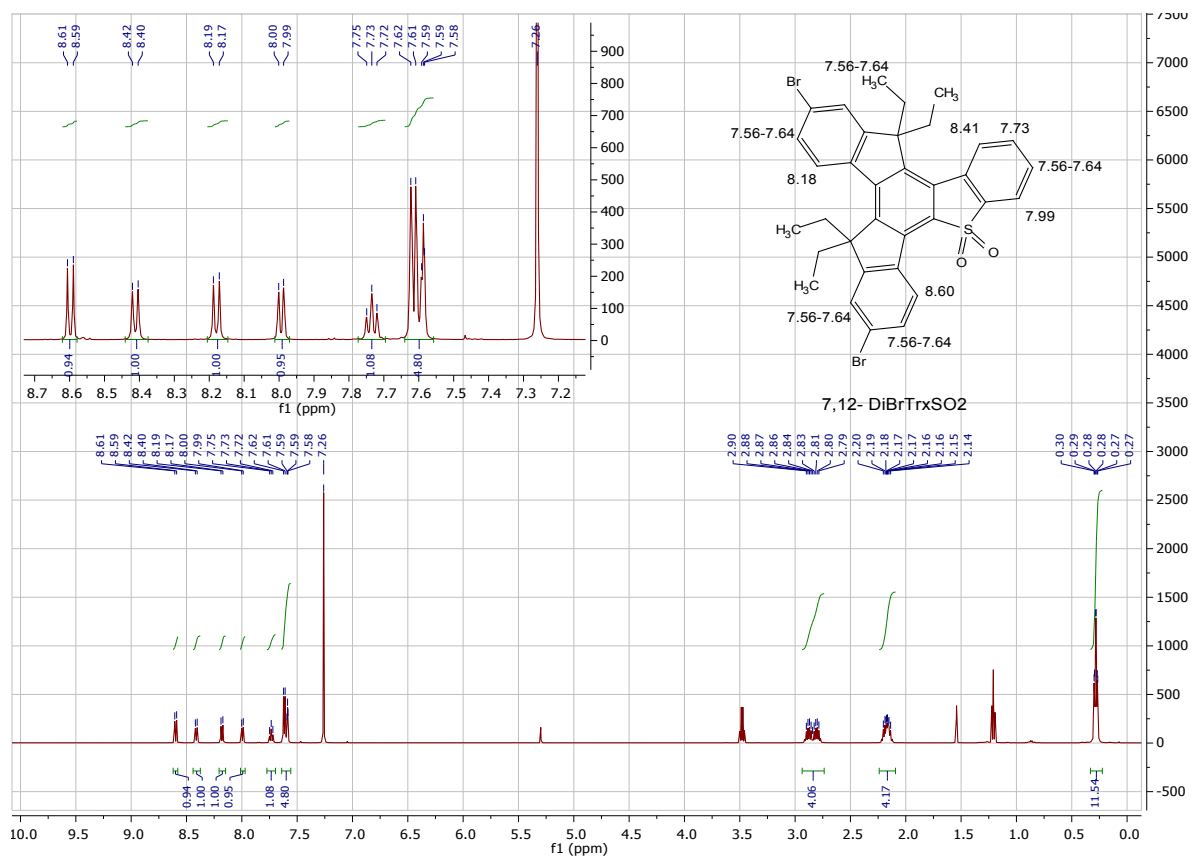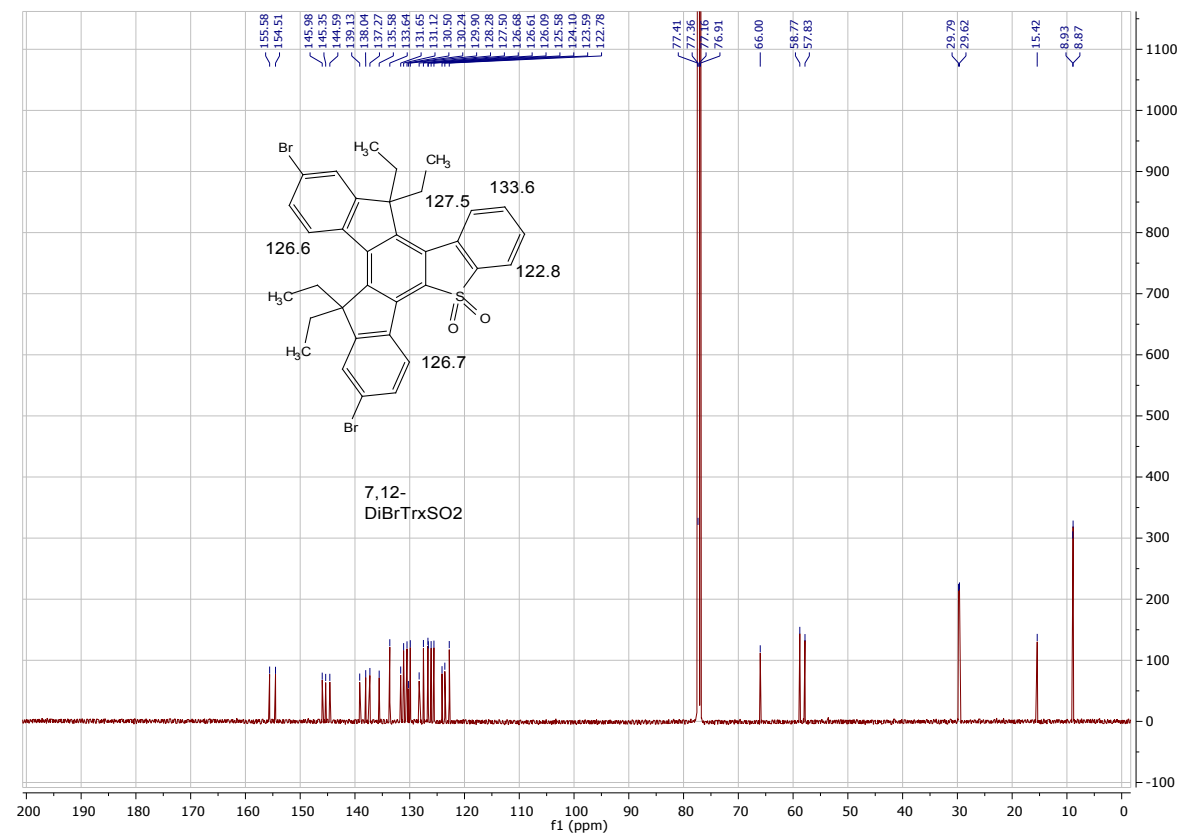

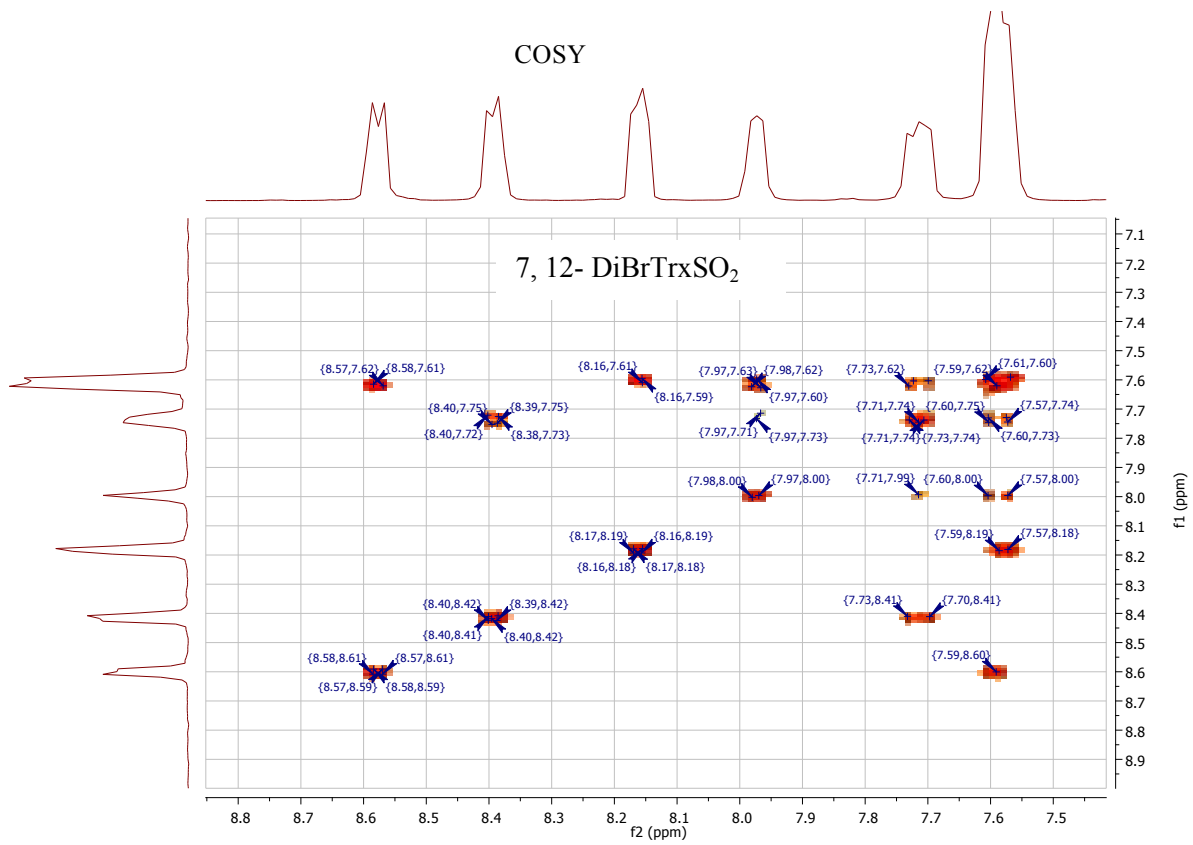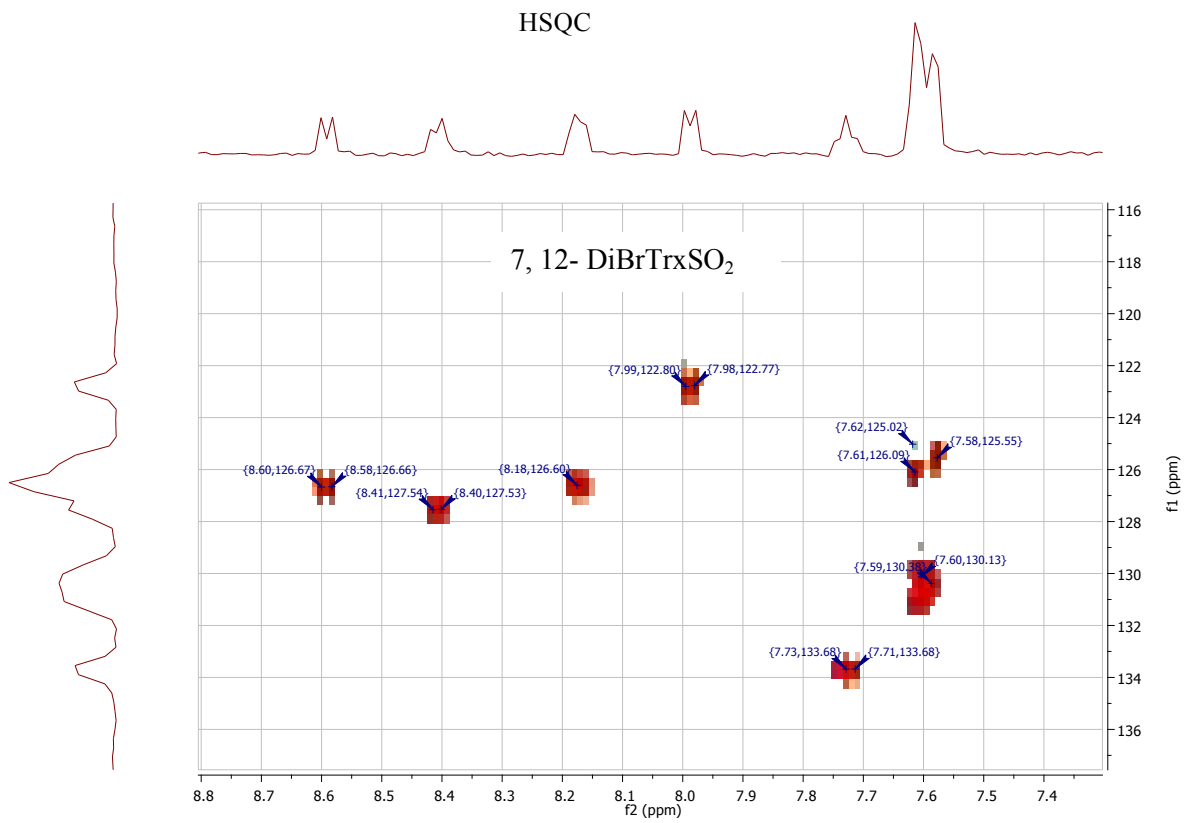

NOESY

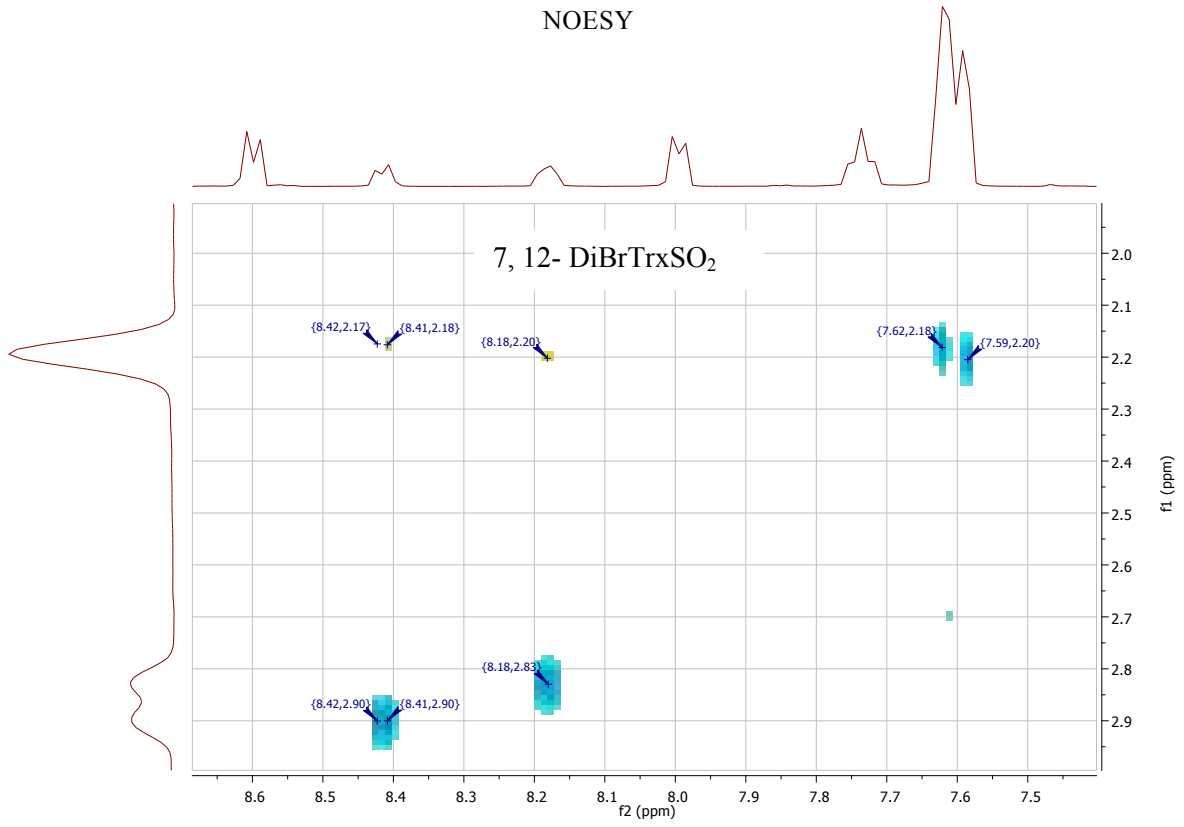

NOESY

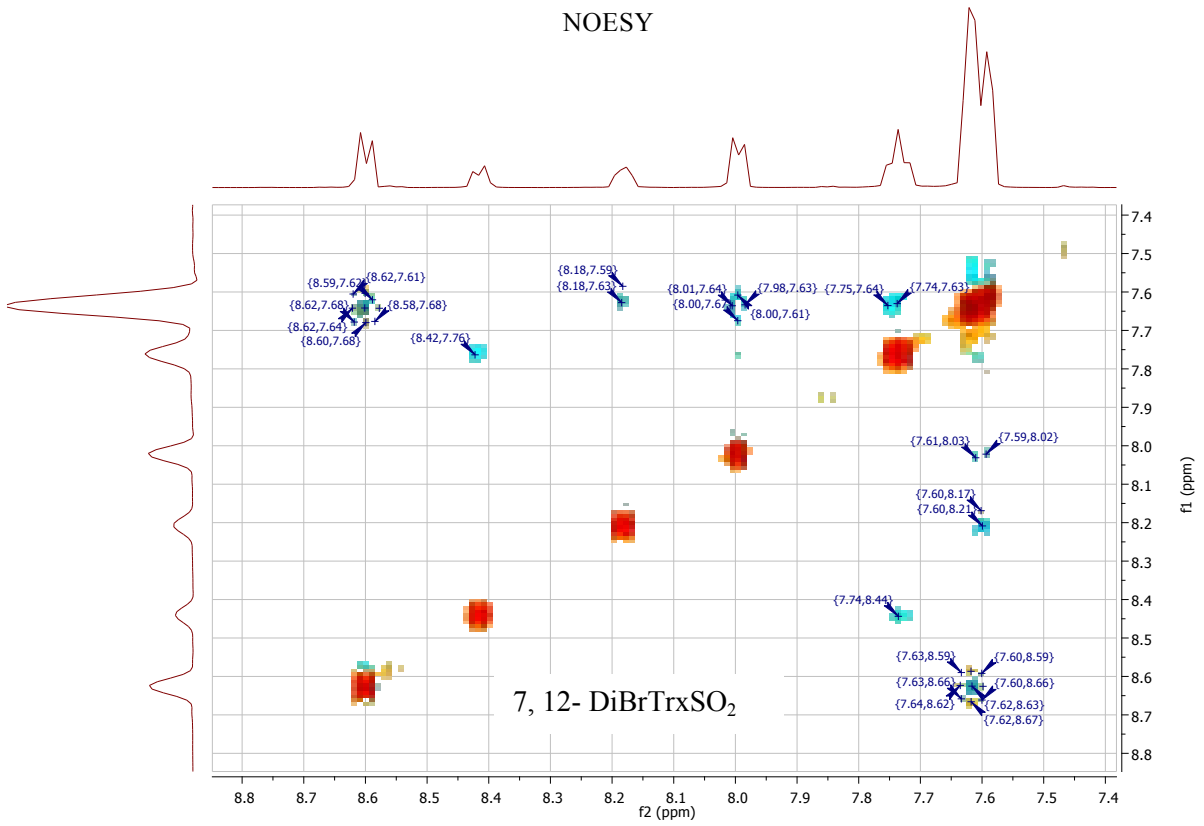

| Acquisition Parameter |            |                      |          |                  |           |
|-----------------------|------------|----------------------|----------|------------------|-----------|
| Source Type           | ESI        | Ion Polarity         | Positive | Set Nebulizer    | 0.4 Bar   |
| Focus                 | Not active |                      |          | Set Dry Heater   | 180 °C    |
| Scan Begin            | 50 m/z     | Set Capillary        | 4500 V   | Set Dry Gas      | 4.0 l/min |
| Scan End              | 3000 m/z   | Set End Plate Offset | -500 V   | Set Divert Valve | Waste     |

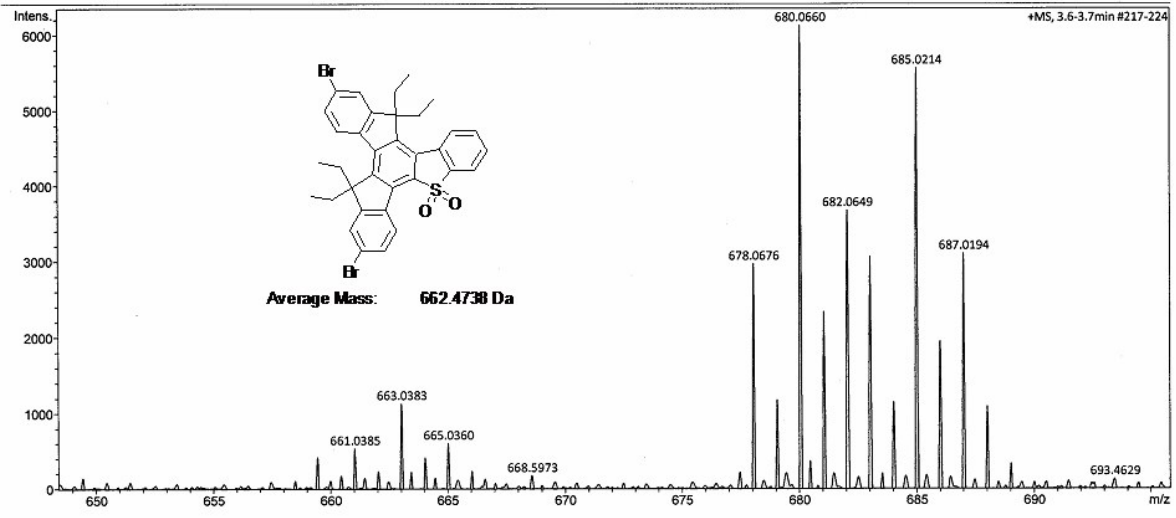

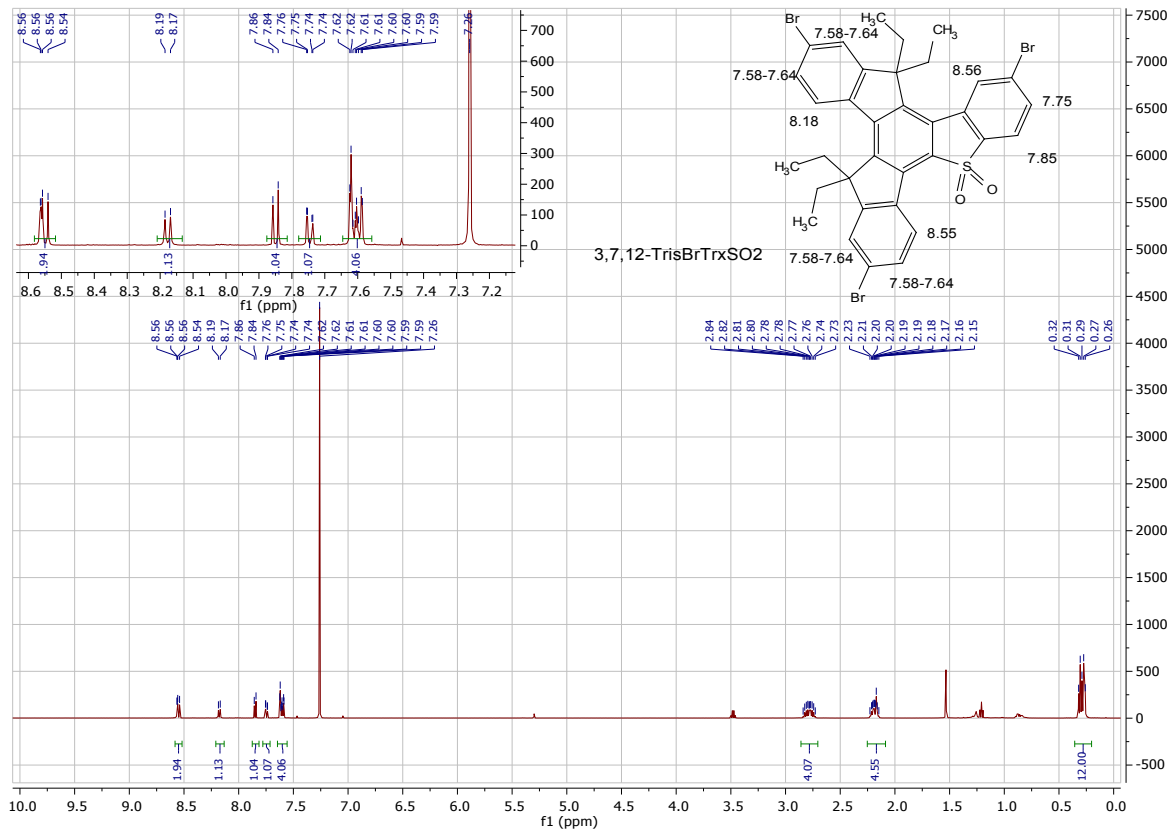

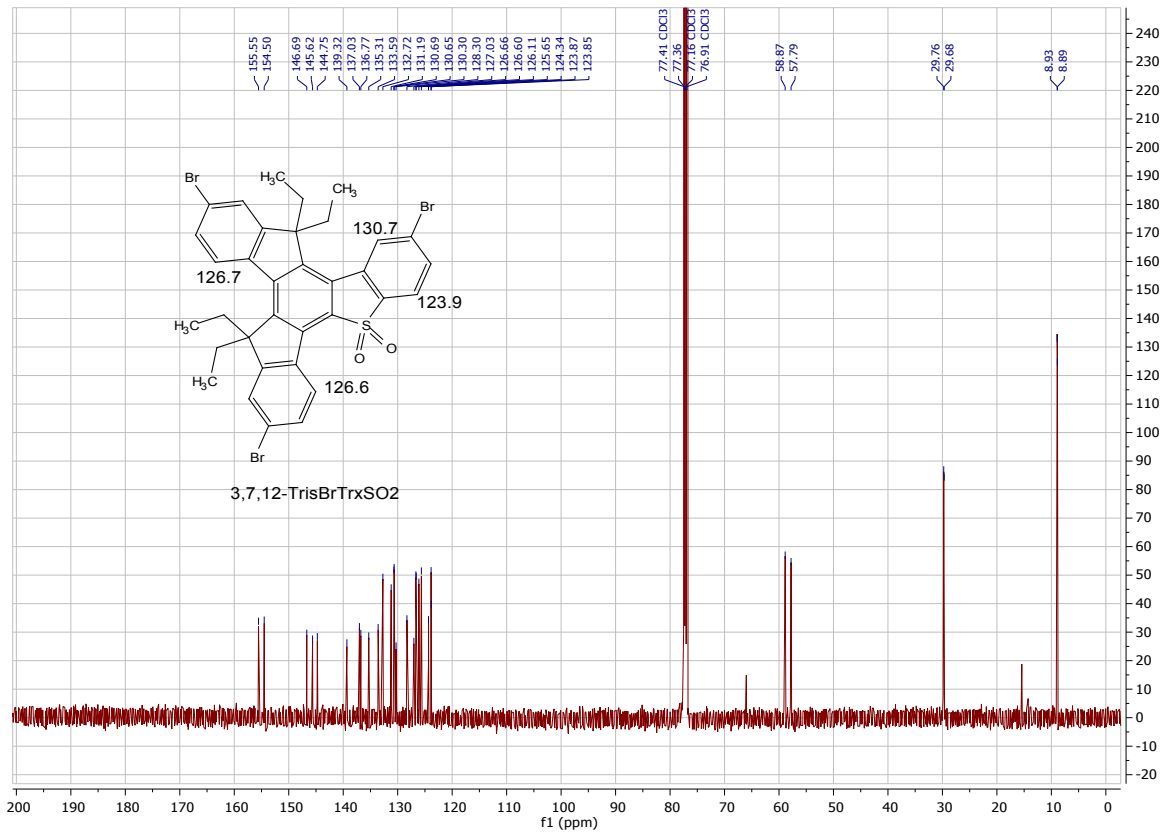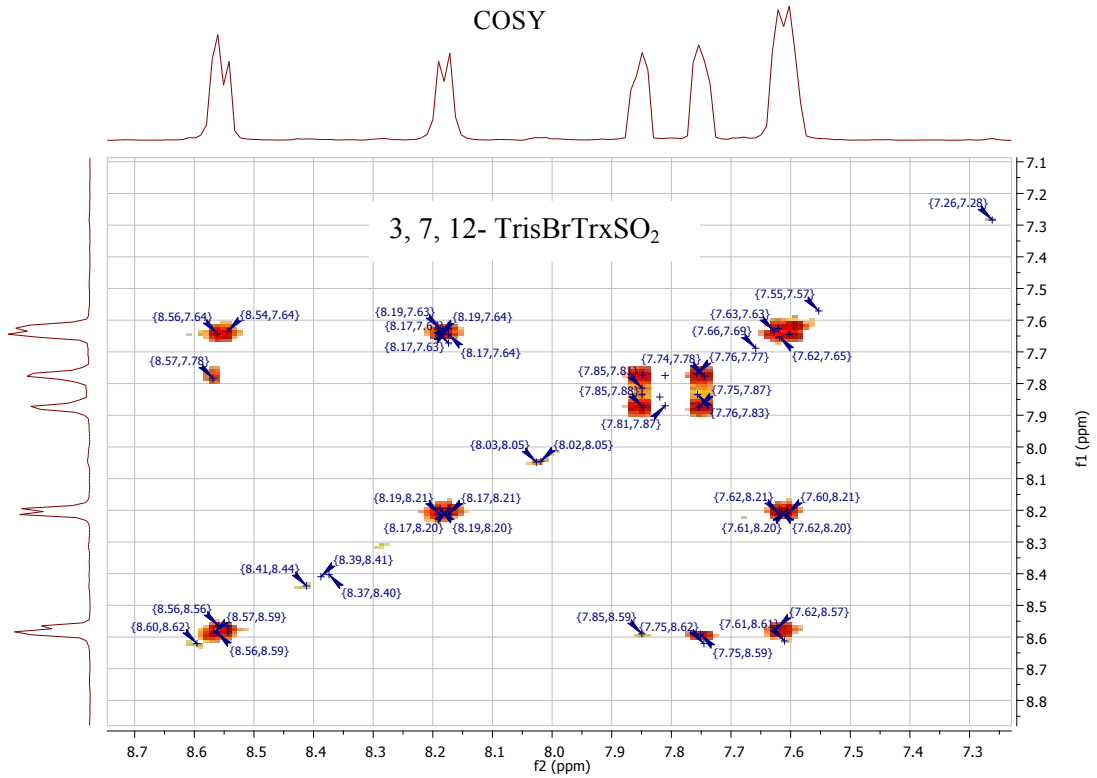

### HSQC

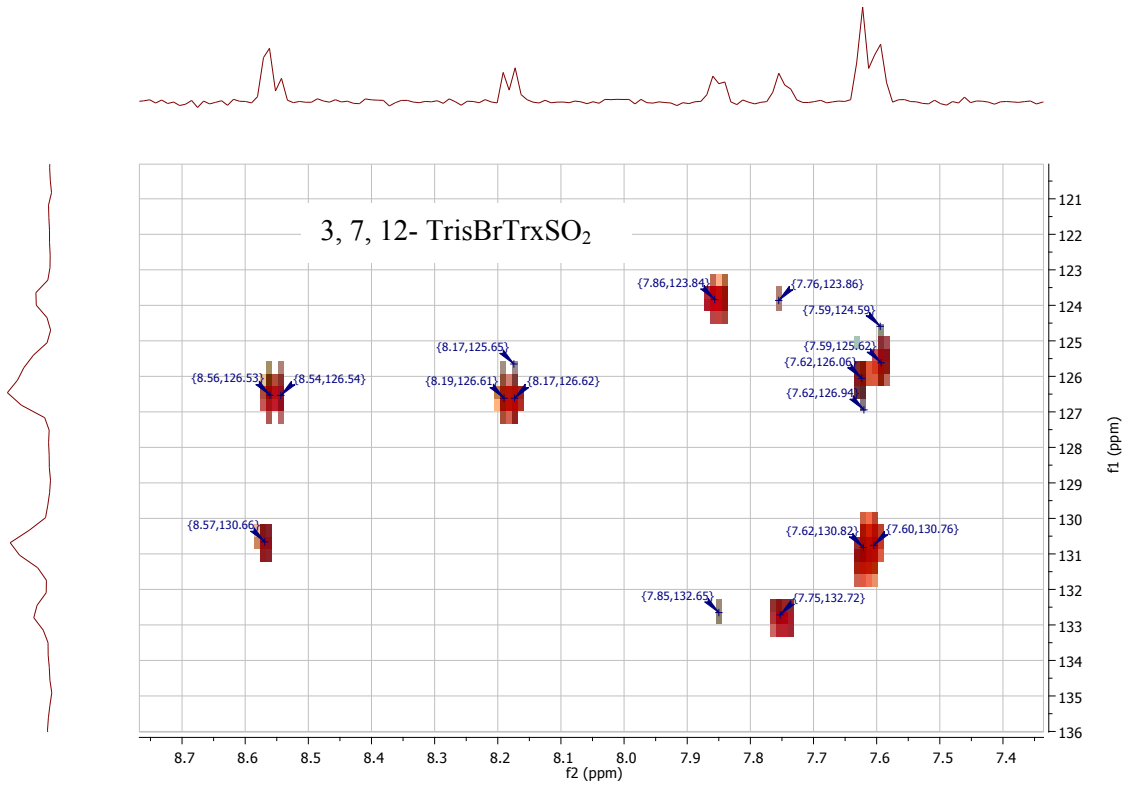

### NOESY

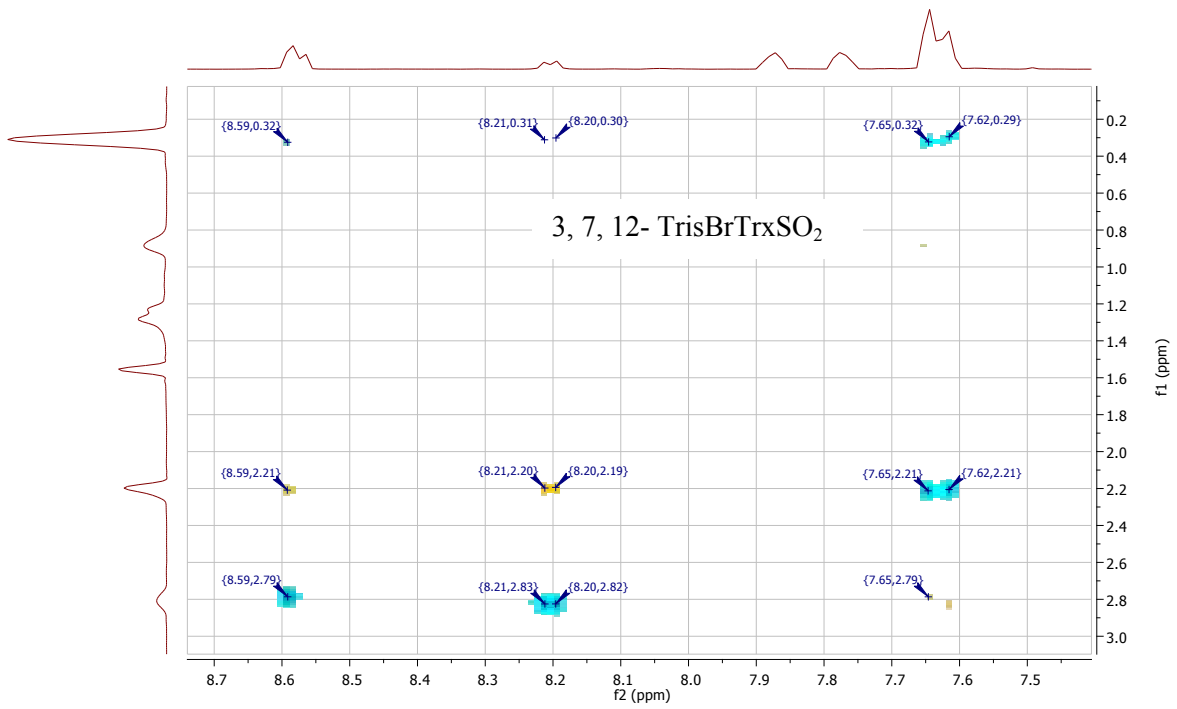

NOESY

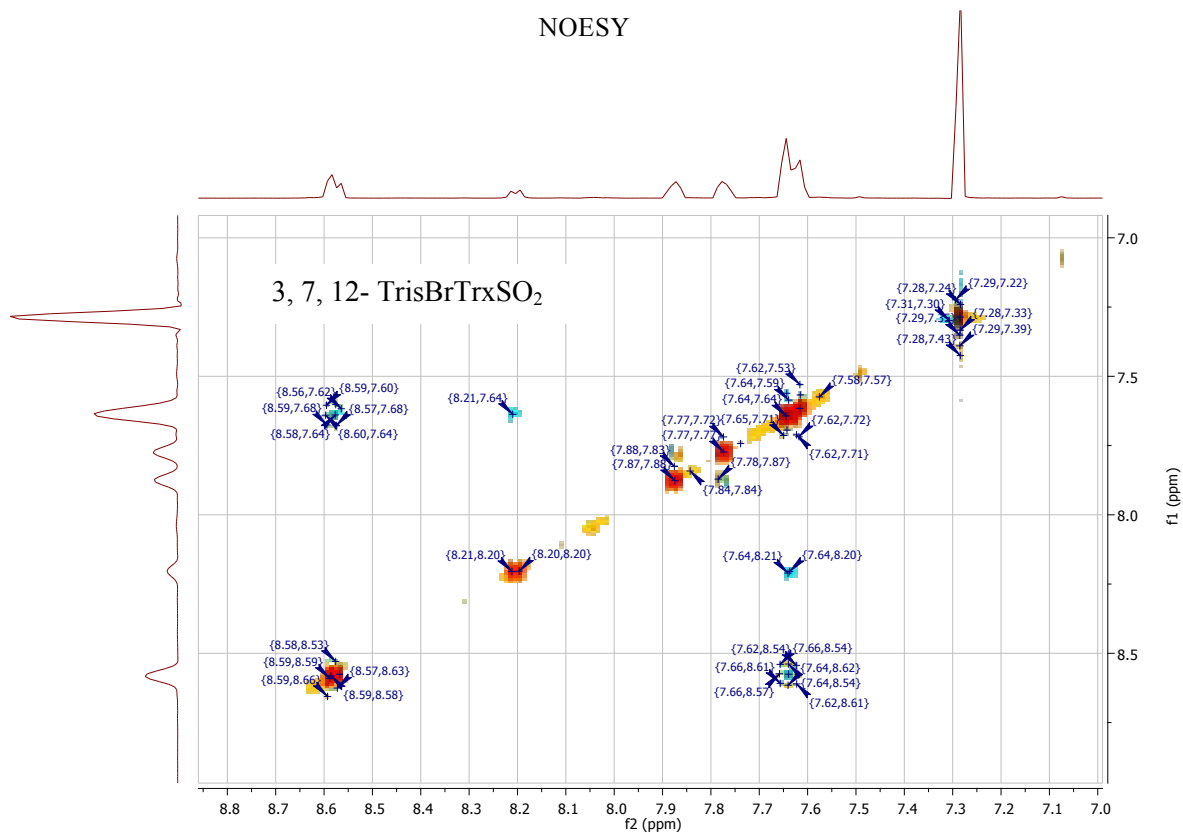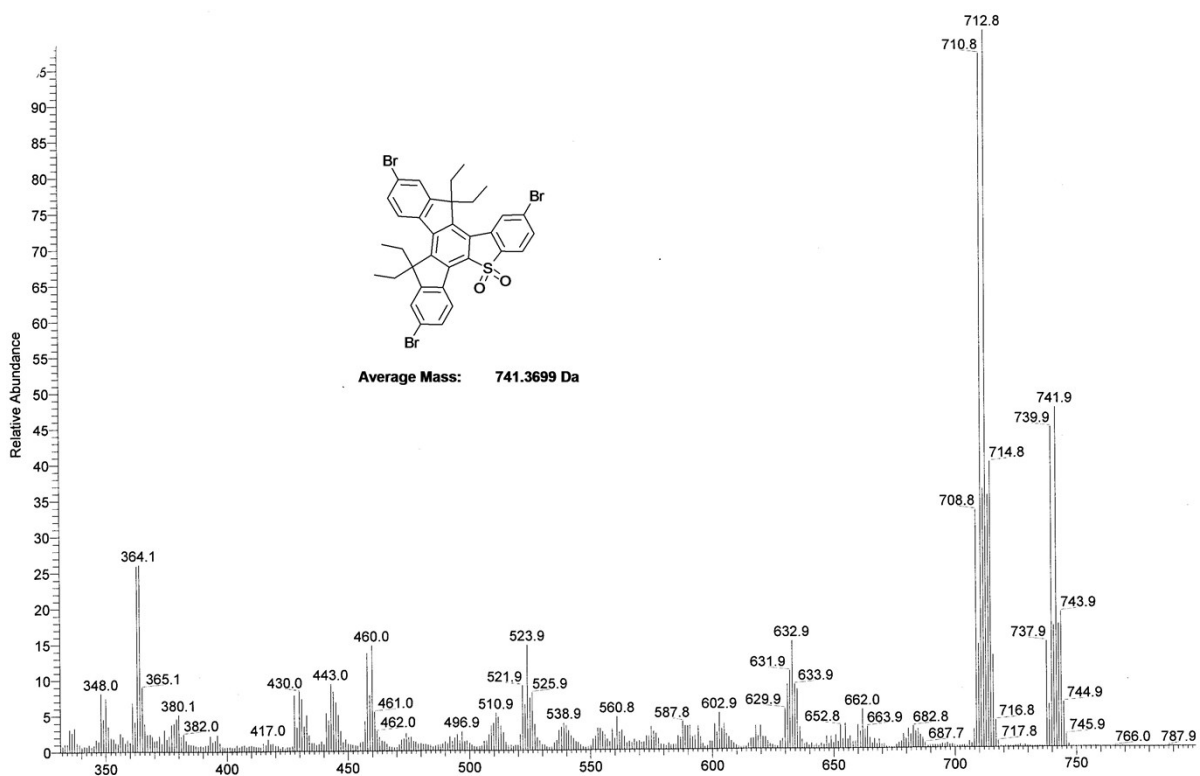



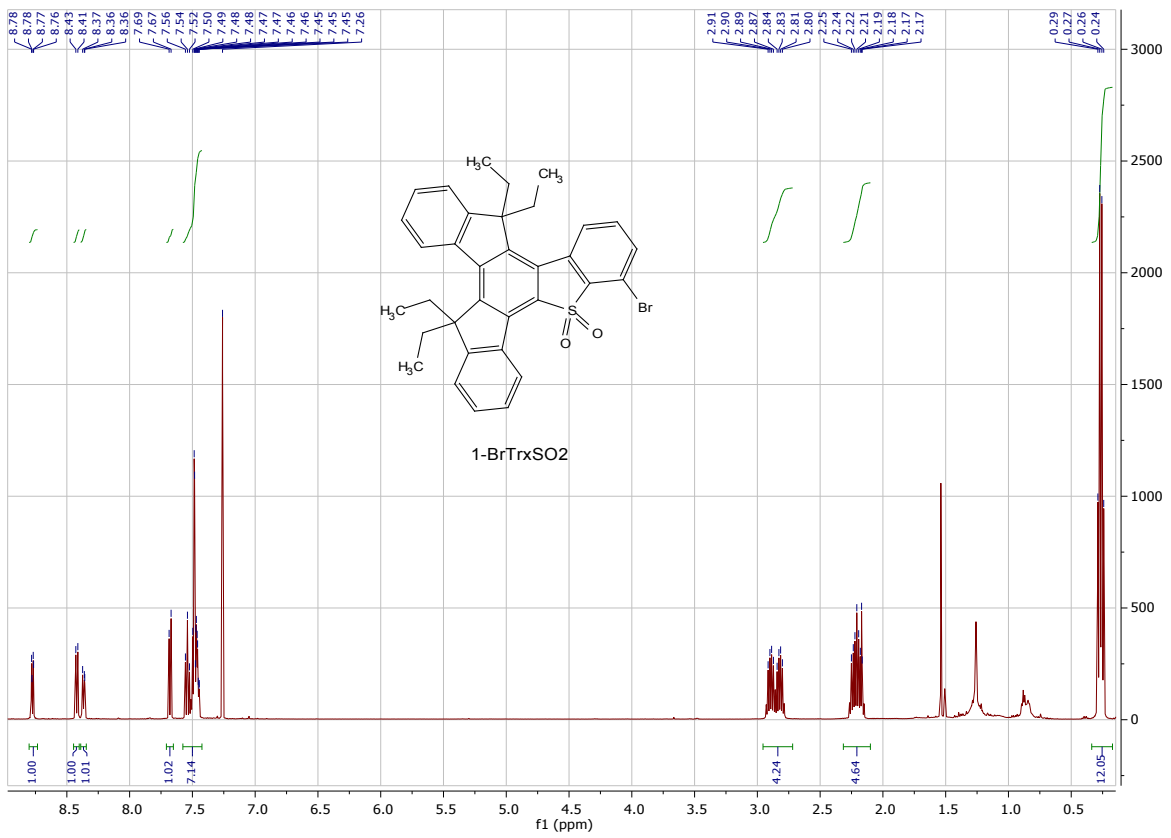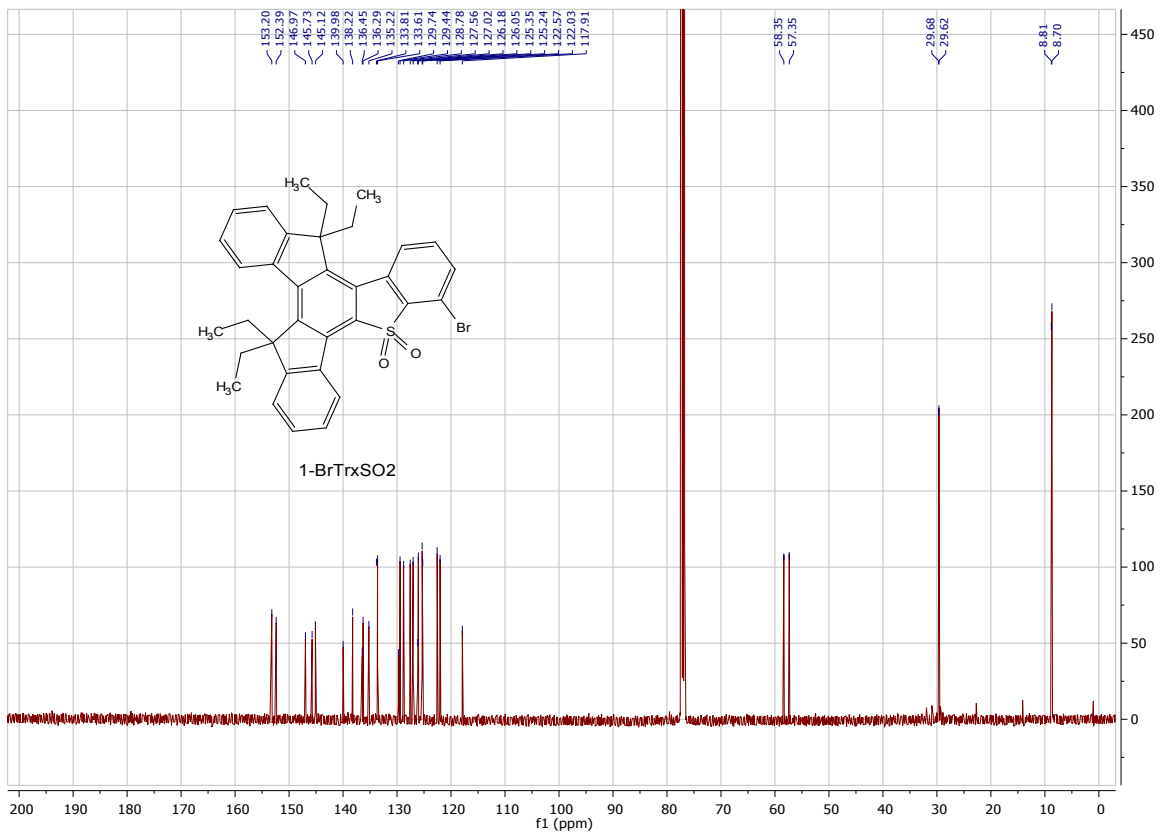

**Acquisition Parameter**

|             |            |                      |          |                  |           |
|-------------|------------|----------------------|----------|------------------|-----------|
| Source Type | ESI        | Ion Polarity         | Positive | Set Nebulizer    | 0.4 Bar   |
| Focus       | Not active | Set Capillary        | 4500 V   | Set Dry Heater   | 180 °C    |
| Scan Begin  | 50 m/z     | Set End Plate Offset | -500 V   | Set Dry Gas      | 4.0 l/min |
| Scan End    | 3000 m/z   |                      |          | Set Divert Valve | Waste     |

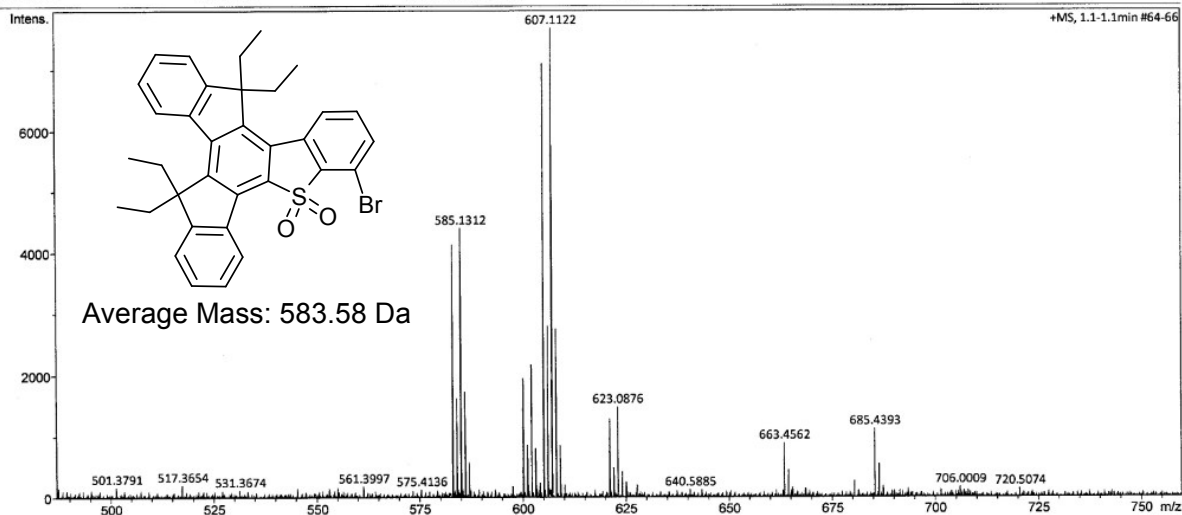

**Acquisition Parameter**

|             |            |                      |          |                  |           |
|-------------|------------|----------------------|----------|------------------|-----------|
| Source Type | ESI        | Ion Polarity         | Positive | Set Nebulizer    | 0.4 Bar   |
| Focus       | Not active | Set Capillary        | 4500 V   | Set Dry Heater   | 180 °C    |
| Scan Begin  | 50 m/z     | Set End Plate Offset | -500 V   | Set Dry Gas      | 4.0 l/min |
| Scan End    | 3000 m/z   |                      |          | Set Divert Valve | Waste     |

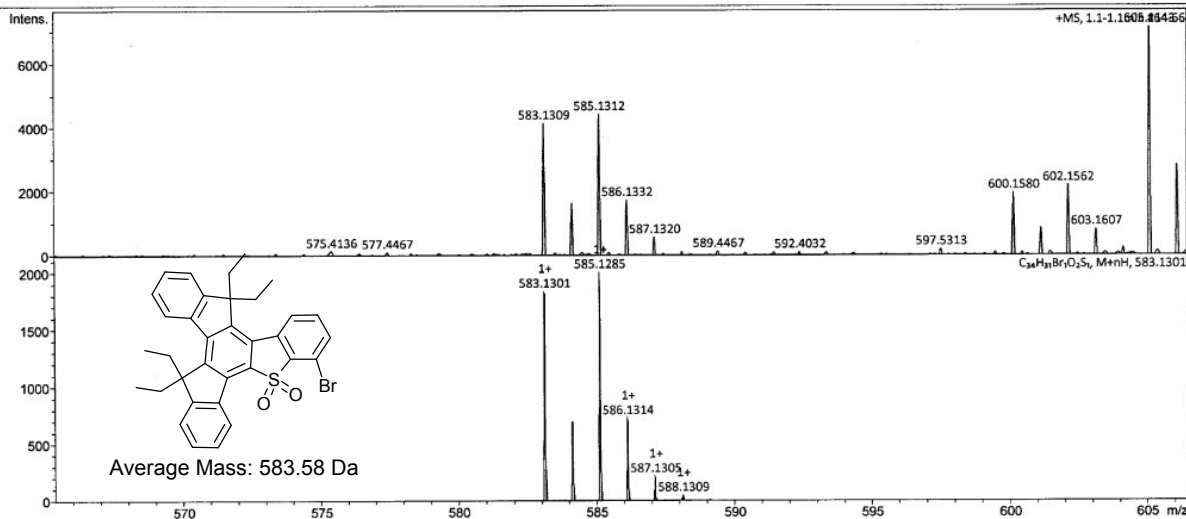

Supplement: c7ra07671a1.pdf [file c7ra07671a1.pdf]
